# Supplementary material for: Discovering mutated driver genes through a robust and sparse co-regularized matrix factorization framework with prior information from mRNA expression patterns and interaction network
Source: PubMed Central journal article supplement (PMC5989443; doi:10.1186/s12859-018-2218-y), 2018-06-05
Supplement: 12859_2018_2218_MOESM1_ESM.pdf [file 12859_2018_2218_MOESM1_ESM.pdf]

# Additional file 1 — Supplementary Figures and Tables

## Discovering mutated driver genes through a robust and sparse co-regularized matrix factorization framework with prior information from mRNA expression patterns and interaction network

Jianing Xi<sup>1</sup>, Minghui Wang<sup>1,2\*</sup>, Ao Li<sup>1,2</sup>

<sup>1</sup>School of Information Science and Technology, University of Science and Technology of China, Hefei 230027, PR China

<sup>2</sup>Centers for Biomedical Engineering, University of Science and Technology of China, Hefei 230027, PR China

\*Corresponding authors: mhwang@ustc.edu.cn

### List of Figures

|                  |                                                                                                                                                                                                                                                                                                                                                                                                                                                                                                                                                                                                                                                                                                                                                   |   |
|------------------|---------------------------------------------------------------------------------------------------------------------------------------------------------------------------------------------------------------------------------------------------------------------------------------------------------------------------------------------------------------------------------------------------------------------------------------------------------------------------------------------------------------------------------------------------------------------------------------------------------------------------------------------------------------------------------------------------------------------------------------------------|---|
| <b>Figure S1</b> | The AUCs of precision recall curves of our proposed method when the number of dimensions $K$ increases, evaluated by (a)-(c) CGC [1] and (d)-(f) IntOGen lists [2]. The results are for datasets of (a) (d) GBM, (b) (e) COADREAD and (c) (f) BRCA. . . . .                                                                                                                                                                                                                                                                                                                                                                                                                                                                                       | 3 |
| <b>Figure S2</b> | Performance comparison of NMF with different kinds of prior information, evaluated by IntOGen list [2]. The precision recall curves of the results of our proposed method (“Proposed”: red), NMF with information of mRNA expression pattern similarity (“Only expression”: orange), NMF with only network information (“Only network”: yellow), and NMF with no prior information (“No prior”: dark red), for datasets of (a) GBM, (b) COADREAD and (c) BRCA. The AUCs of precision recall curves of “Proposed”, “Only expression”, “Only network” and “No prior”, displayed as bar plot, for datasets of (d) GBM, (e) COADREAD and (f) BRCA. . . .                                                                                              | 3 |
| <b>Figure S3</b> | Performance of our proposed method when the parameters for sparseness (or robustness) are fixed and the parameters for prior knowledge varies, where $\lambda_{RV}$ , $\lambda_{LV}$ and $\lambda_{RU}$ are fixed to 1.0 and $\lambda_{LU}$ varies in range of 0, 0.001, 0.01, 0.1 and 1, evaluated by (a)-(f) CGC [1] and (g)-(l) IntOGen lists [2]. The precision recall curves of the results of our methods for datasets of (a) (g) GBM, (b) (h) COADREAD and (c) (i) BRCA. The AUCs of precision recall curves displayed as bar plot, for datasets of (d) (j) GBM, (e) (k) COADREAD and (f) (l) BRCA. . . .                                                                                                                                  | 4 |
| <b>Figure S4</b> | Performance of our proposed method when the parameters for sparseness (or robustness) are fixed and the parameters for prior knowledge varies, where $\lambda_{RU}$ , $\lambda_{LU}$ and $\lambda_{RV}$ are fixed to 1.0 and $\lambda_{LV}$ varies in range of 0, 0.001, 0.01, 0.1 and 1, evaluated by (a)-(f) CGC [1] and (g)-(l) IntOGen lists [2]. The precision recall curves of the results of our methods for datasets of (a) (g) GBM, (b) (h) COADREAD and (c) (i) BRCA. The AUCs of precision recall curves displayed as bar plot, for datasets of (d) (j) GBM, (e) (k) COADREAD and (f) (l) BRCA. . . .                                                                                                                                  | 5 |
| <b>Figure S5</b> | Performance comparison of our proposed method and existing network-based methods, evaluated by IntOGen list [2]. The precision recall curves of the results of our proposed method (red), DawnRank (brown), DriverNet (medium purple), HotNet2 (orange), ReMIC( $\beta=0.01$ ) (green), ReMIC( $\beta=0.02$ ) (cyan), ReMIC( $\beta=0.03$ ) (blue), MUFFINN(DNmax) (violet), MUFFINN(DNsum) (magenta) and baseline by mutation frequency (gray), for datasets of (a) GBM, (b) COADREAD and (c) BRCA. The AUCs of precision recall curves of the competing methods, displayed as bar plot, for datasets of (d) GBM, (e) COADREAD and (f) BRCA. The black dash lines in (d)-(f) represent the AUC values of baseline by mutation frequency. . . . . | 6 |
| <b>Figure S6</b> | Performance comparison of our proposed method and existing network-based methods, evaluated by CGC list [1]. The precision recall curves of the results of our proposed method (red), DawnRank (brown), DriverNet (medium purple), HotNet2 (orange), ReMIC( $\beta=0.01$ ) (green), ReMIC( $\beta=0.02$ ) (cyan), ReMIC( $\beta=0.03$ ) (blue), MUFFINN(DNmax) (violet), MUFFINN(DNsum) (magenta) and baseline by mutation frequency (gray), for datasets of (a) KIRC, (b) THCA and (c) PRAD. The AUCs of precision recall curves of the competing methods, displayed as bar plot, for datasets of (d) KIRC, (e) THCA and (f) PRAD. The black dash lines in (d)-(f) represent the AUC values of baseline by mutation frequency. . . . .           | 7 |
| <b>Figure S7</b> | Performance comparison of our proposed method and existing network-based methods, evaluated by IntOGen list [2]. The precision recall curves of the results of our proposed method (red), DawnRank (brown), DriverNet (medium purple), HotNet2 (orange), ReMIC( $\beta=0.01$ ) (green), ReMIC( $\beta=0.02$ ) (cyan), ReMIC( $\beta=0.03$ ) (blue), MUFFINN(DNmax) (violet), MUFFINN(DNsum) (magenta) and baseline by mutation frequency (gray), for datasets of (a) KIRC, (b) THCA and (c) PRAD. The AUCs of precision recall curves of the competing methods, displayed as bar plot, for datasets of (d) KIRC, (e) THCA and (f) PRAD. The black dash lines in (d)-(f) represent the AUC values of baseline by mutation frequency. . . . .       | 8 |

**Figure S8** Performance comparison of our proposed method and existing network-based methods with network information from both iRefIndex [3] and String v10 [4], evaluated by (a)-(f) CGC [1] and (g)-(l) IntOGen list [2]. The precision recall curves of the results of our proposed method for iRefIndex (red dashed line) and String v10 (red dotted line), HotNet2 for iRefIndex (orange dashed line) and String v10 (orange dotted line), ReMIC( $\beta=0.01$ ) for iRefIndex (green dashed line) and String v10 (green dotted line), ReMIC( $\beta=0.02$ ) for iRefIndex (cyan dashed line) and String v10 (cyan dotted line), ReMIC( $\beta=0.03$ ) for iRefIndex (blue dashed line) and String v10 (blue dotted line), MUFFINN(DNmax) for iRefIndex (violet dashed line) and String v10 (violet dotted line), MUFFINN(DNsum) for iRefIndex (magenta dashed line) and String v10 (magenta dotted line), for datasets of (a) (g) KIRC, (b) (h) THCA and (c) (i) PRAD. The AUCs of precision recall curves of the competing methods, displayed as bar plot, for datasets of (d) (j) KIRC, (e) (k) THCA and (f) (l) PRAD. . . . . 9

## List of Tables

|                                                                                                                                                                                                                                                                                                                   |    |
|-------------------------------------------------------------------------------------------------------------------------------------------------------------------------------------------------------------------------------------------------------------------------------------------------------------------|----|
| <b>Table S1</b> Fisher’s exact test on the top scored candidates of GBM results for CGC and IntOGen benchmarking genes. The p-values are for the results our proposed method, HotNet2, ReMIC( $\beta=0.01$ ), ReMIC( $\beta=0.02$ ), ReMIC( $\beta=0.03$ ), MUFFINN(DNmax) and MUFFINN(DNsum). . . . .            | 10 |
| <b>Table S2</b> Fisher’s exact test on the top scored candidates of BRCA results for CGC and IntOGen benchmarking genes. The p-values are for the results our proposed method, HotNet2, ReMIC( $\beta=0.01$ ), ReMIC( $\beta=0.02$ ), ReMIC( $\beta=0.03$ ), MUFFINN(DNmax) and MUFFINN(DNsum). . . . .           | 10 |
| <b>Table S3</b> The full list of the top 200 genes detected by our model on GBM dataset. The table demonstrates the ranks of the genes, gene symbols, mutation rates, the included benchmarking gene lists [1, 2] of the genes and the other methods [5, 6, 7] by which the genes are also detected. . . . .      | 11 |
| <b>Table S4</b> The full list of the top 200 genes detected by our model on COADREAD dataset. The table demonstrates the ranks of the genes, gene symbols, mutation rates, the included benchmarking gene lists [1, 2] of the genes and the other methods [5, 6, 7] by which the genes are also detected. . . . . | 14 |
| <b>Table S5</b> The full list of the top 200 genes detected by our model on BRCA dataset. The table demonstrates the ranks of the genes, gene symbols, mutation rates, the included benchmarking gene lists [1, 2] of the genes and the other methods [5, 6, 7] by which the genes are also detected. . . . .     | 17 |
| <b>Table S6</b> Functional enrichment analysis results for KEGG pathways [8] of the top 200 genes of the proposed method on COADREAD dataset. The pathways are sorted by their enrichment p-values. . . . .                                                                                                       | 20 |
| <b>Table S7</b> Functional enrichment analysis results for KEGG pathways [8] of the top 200 genes of the proposed method on BRCA dataset. The pathways are sorted by their enrichment p-values. . . . .                                                                                                           | 20 |

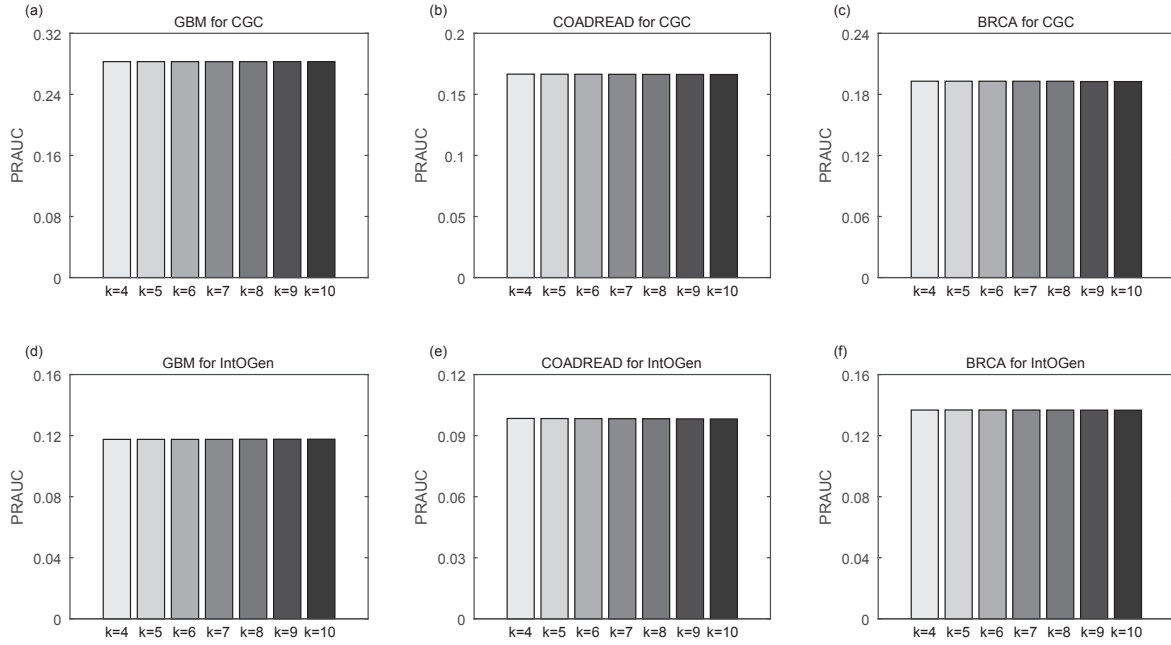

**Figure S1.** The AUCs of precision recall curves of our proposed method when the number of dimensions  $K$  increases, evaluated by (a)-(c) CGC [1] and (d)-(f) IntOGen lists [2]. The results are for datasets of (a) (d) GBM, (b) (e) COADREAD and (c) (f) BRCA.

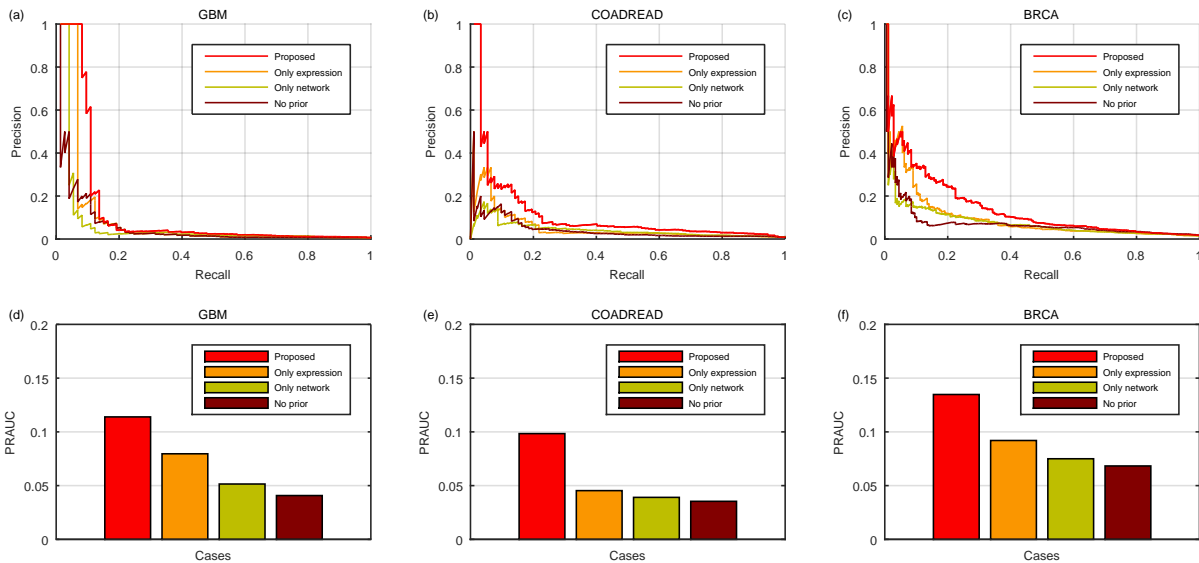

**Figure S2.** Performance comparison of NMF with different kinds of prior information, evaluated by IntOGen list [2]. The precision recall curves of the results of our proposed method (“Proposed”: red), NMF with information of mRNA expression pattern similarity (“Only expression”: orange), NMF with only network information (“Only network”: yellow), and NMF with no prior information (“No prior”: dark red), for datasets of (a) GBM, (b) COADREAD and (c) BRCA. The AUCs of precision recall curves of “Proposed”, “Only expression”, “Only network” and “No prior”, displayed as bar plot, for datasets of (d) GBM, (e) COADREAD and (f) BRCA.

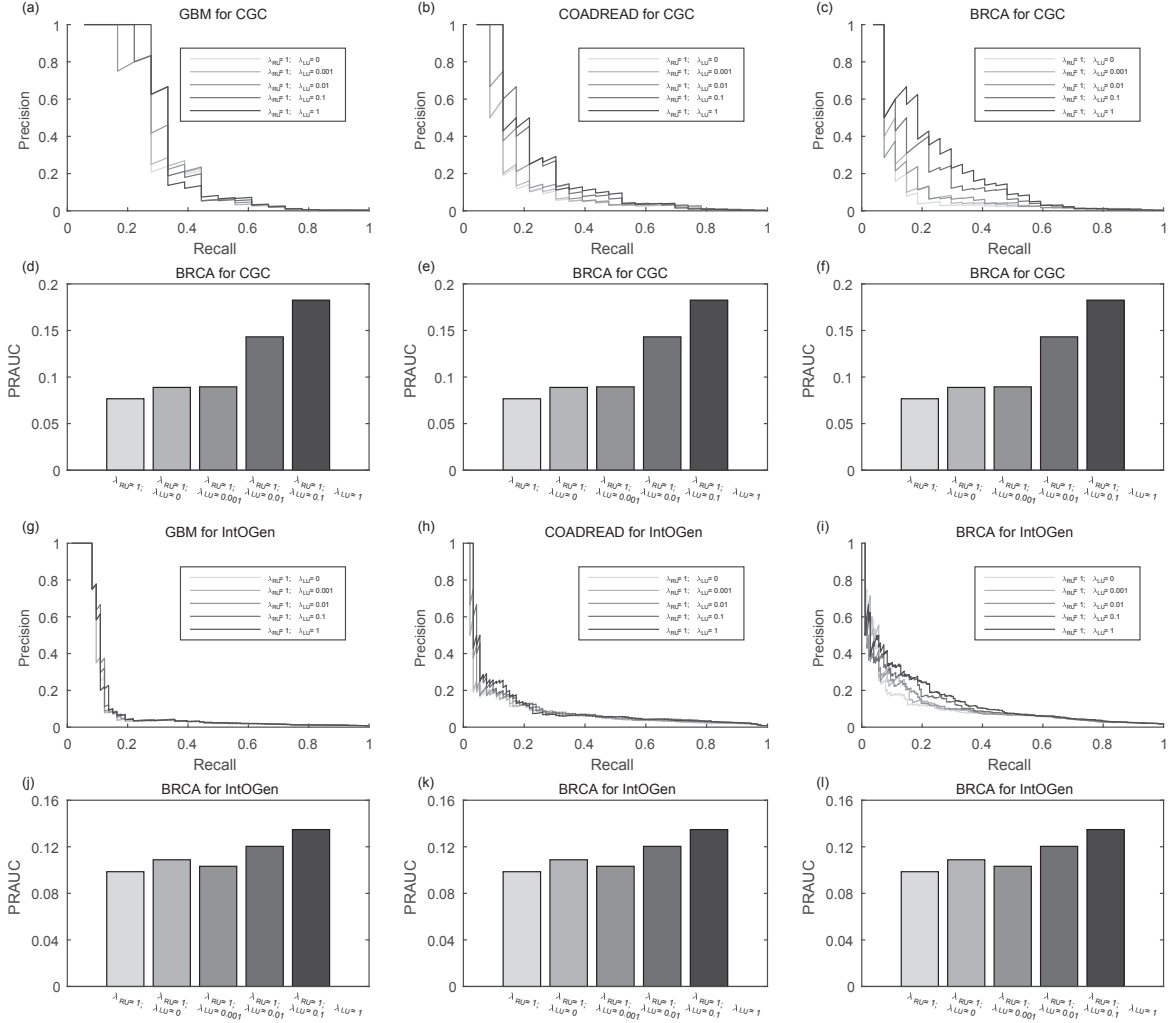

**Figure S3.** Performance of our proposed method when the parameters for sparseness (or robustness) are fixed and the parameters for prior knowledge varies, where  $\lambda_{RV}$ ,  $\lambda_{LV}$  and  $\lambda_{RU}$  are fixed to 1.0 and  $\lambda_{LU}$  varies in range of 0, 0.001, 0.01, 0.1 and 1, evaluated by (a)-(f) CGC [1] and (g)-(l) IntOGen lists [2]. The precision recall curves of the results of our methods for datasets of (a) (g) GBM, (b) (h) COADREAD and (c) (i) BRCA. The AUCs of precision recall curves displayed as bar plot, for datasets of (d) (j) GBM, (e) (k) COADREAD and (f) (l) BRCA.

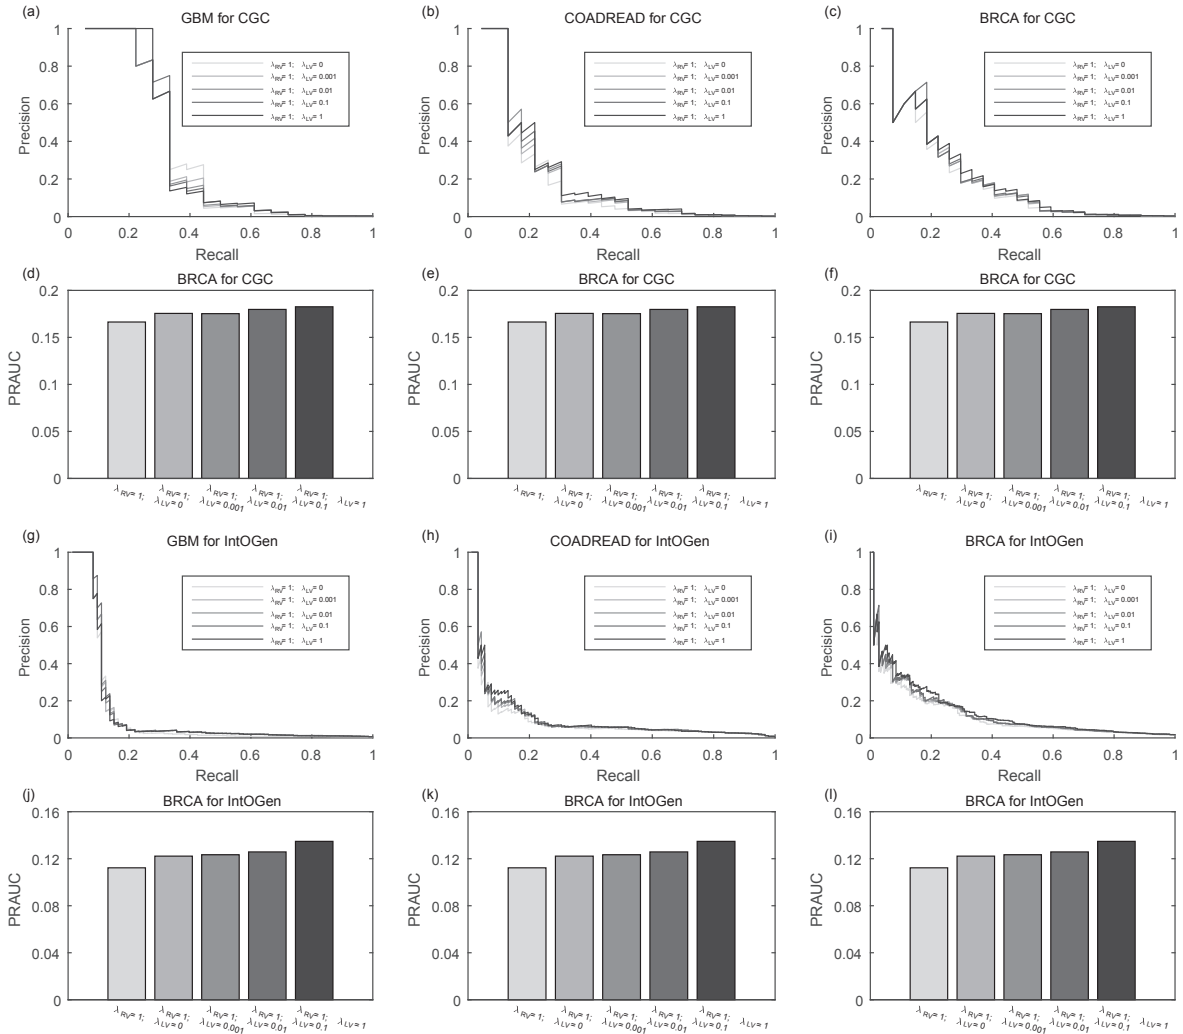

**Figure S4.** Performance of our proposed method when the parameters for sparseness (or robustness) are fixed and the parameters for prior knowledge varies, where  $\lambda_{RU}$ ,  $\lambda_{LU}$  and  $\lambda_{RV}$  are fixed to 1.0 and  $\lambda_{LV}$  varies in range of 0, 0.001, 0.01, 0.1 and 1, evaluated by (a)-(f) CGC [1] and (g)-(l) IntOGen lists [2]. The precision recall curves of the results of our methods for datasets of (a) (g) GBM, (b) (h) COADREAD and (c) (i) BRCA. The AUCs of precision recall curves displayed as bar plot, for datasets of (d) (j) GBM, (e) (k) COADREAD and (f) (l) BRCA.

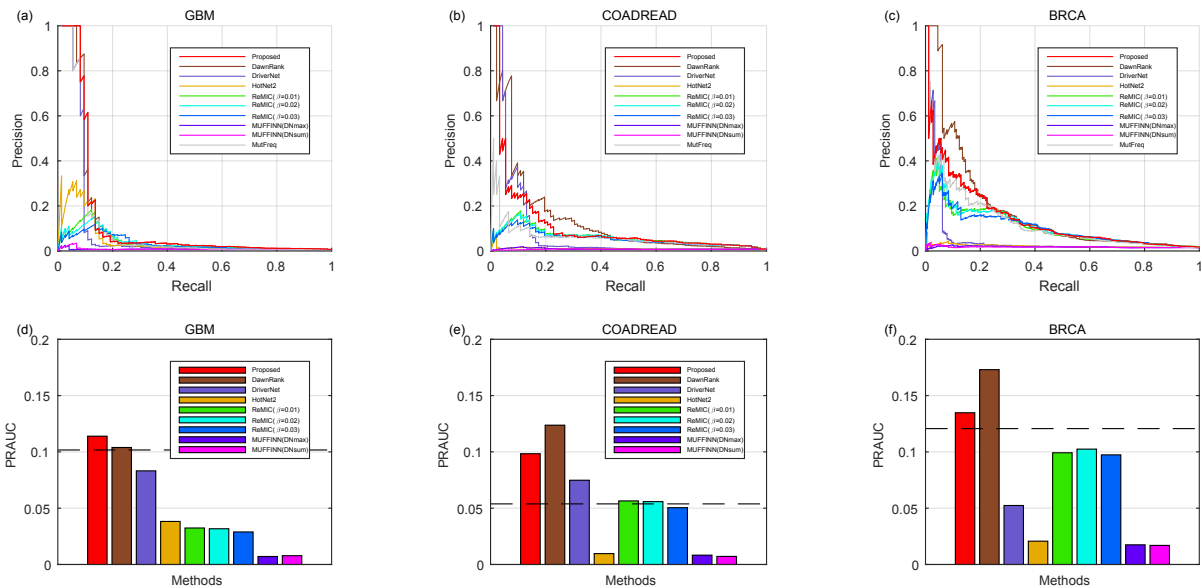

**Figure S5.** Performance comparison of our proposed method and existing network-based methods, evaluated by IntOGen list [2]. The precision recall curves of the results of our proposed method (red), DawnRank (brown), DriverNet (medium purple), HotNet2 (orange), ReMIC( $\beta=0.01$ ) (green), ReMIC( $\beta=0.02$ ) (cyan), ReMIC( $\beta=0.03$ ) (blue), MUFFINN(DNmax) (violet), MUFFINN(DNsum) (magenta) and baseline by mutation frequency (gray), for datasets of (a) GBM, (b) COADREAD and (c) BRCA. The AUCs of precision recall curves of the competing methods, displayed as bar plot, for datasets of (d) GBM, (e) COADREAD and (f) BRCA. The black dash lines in (d)-(f) represent the AUC values of baseline by mutation frequency.

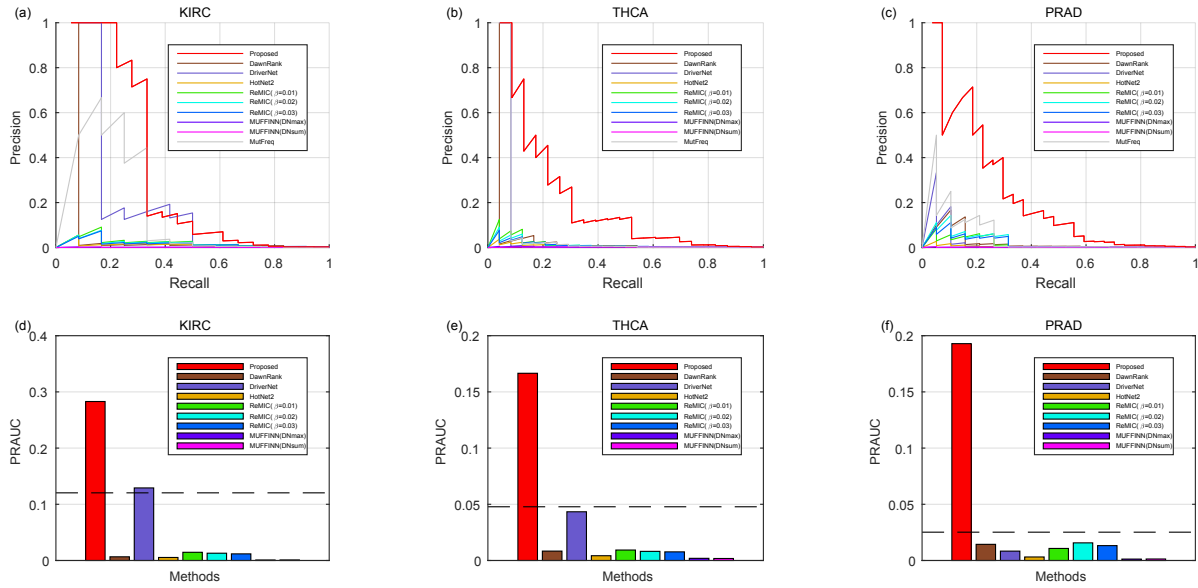

**Figure S6.** Performance comparison of our proposed method and existing network-based methods, evaluated by CGC list [1]. The precision recall curves of the results of our proposed method (red), DawnRank (brown), DriverNet (medium purple), HotNet2 (orange), ReMIC( $\beta=0.01$ ) (green), ReMIC( $\beta=0.02$ ) (cyan), ReMIC( $\beta=0.03$ ) (blue), MUFFINN(DNmax) (violet), MUFFINN(DNsum) (magenta) and baseline by mutation frequency (gray), for datasets of (a) KIRC, (b) THCA and (c) PRAD. The AUCs of precision recall curves of the competing methods, displayed as bar plot, for datasets of (d) KIRC, (e) THCA and (f) PRAD. The black dash lines in (d)-(f) represent the AUC values of baseline by mutation frequency.

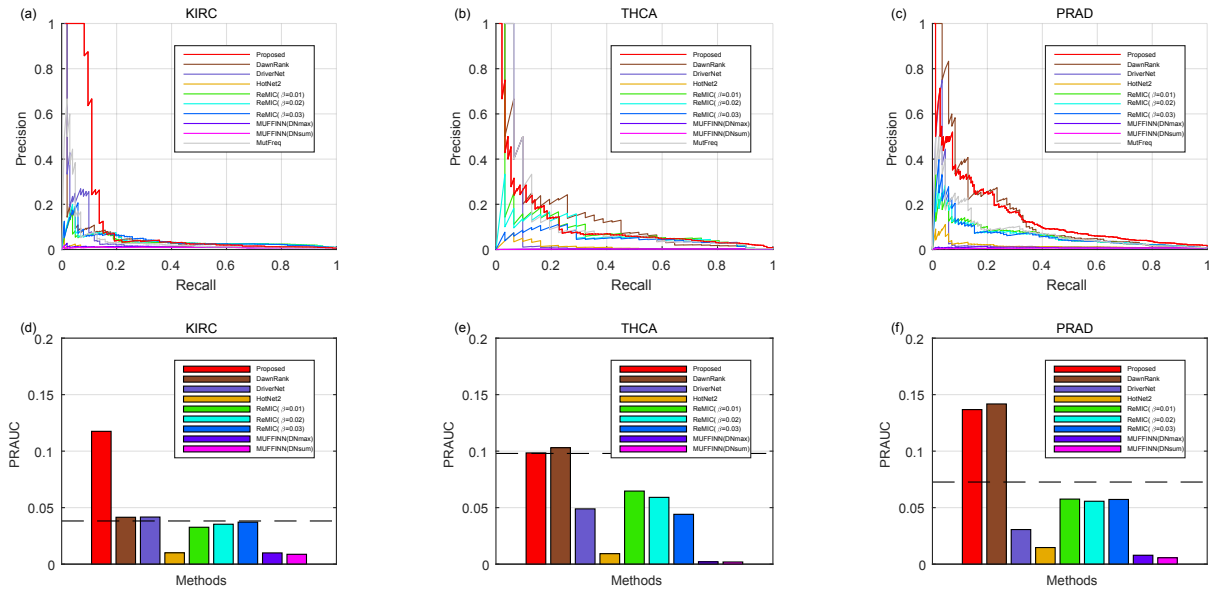

**Figure S7.** Performance comparison of our proposed method and existing network-based methods, evaluated by IntOGen list [2]. The precision recall curves of the results of our proposed method (red), DawnRank (brown), DriverNet (medium purple), HotNet2 (orange), ReMIC( $\beta=0.01$ ) (green), ReMIC( $\beta=0.02$ ) (cyan), ReMIC( $\beta=0.03$ ) (blue), MUFFINN(DNmax) (violet), MUFFINN(DNsum) (magenta) and baseline by mutation frequency (gray), for datasets of (a) KIRC, (b) THCA and (c) PRAD. The AUCs of precision recall curves of the competing methods, displayed as bar plot, for datasets of (d) KIRC, (e) THCA and (f) PRAD. The black dash lines in (d)-(f) represent the AUC values of baseline by mutation frequency.



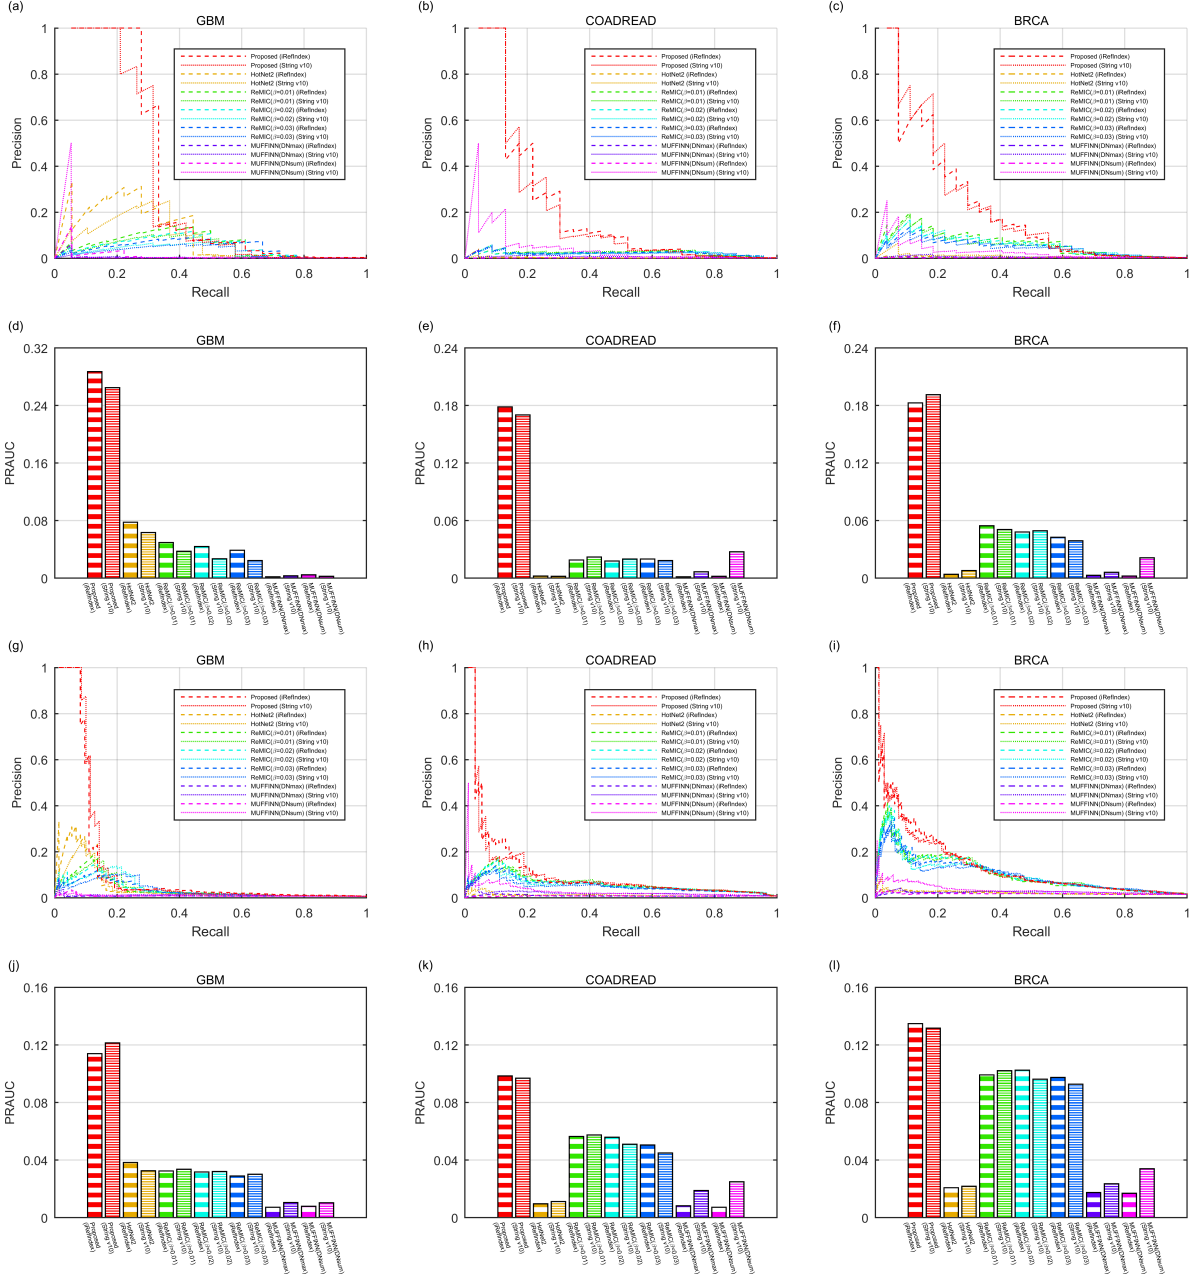

**Figure S8.** Performance comparison of our proposed method and existing network-based methods with network information from both iRefIndex [3] and String v10 [4], evaluated by (a)-(f) CGC [1] and (g)-(l) IntOGen list [2]. The precision recall curves of the results of our proposed method for iRefIndex (red dashed line) and String v10 (red dotted line), HotNet2 for iRefIndex (orange dashed line) and String v10 (orange dotted line), ReMIC( $\beta=0.01$ ) for iRefIndex (green dashed line) and String v10 (green dotted line), ReMIC( $\beta=0.02$ ) for iRefIndex (cyan dashed line) and String v10 (cyan dotted line), ReMIC( $\beta=0.03$ ) for iRefIndex (blue dashed line) and String v10 (blue dotted line), MUFFINN(DNmax) for iRefIndex (violet dashed line) and String v10 (violet dotted line), MUFFINN(DNsum) for iRefIndex (magenta dashed line) and String v10 (magenta dotted line), for datasets of (a) (g) KIRC, (b) (h) THCA and (c) (i) PRAD. The AUCs of precision recall curves of the competing methods, displayed as bar plot, for datasets of (d) (j) KIRC, (e) (k) THCA and (f) (l) PRAD.

**Table S1.** Fisher’s exact test on the top scored candidates of GBM results for CGC and IntOGen benchmarking genes. The p-values are for the results our proposed method, HotNet2, ReMIC( $\beta=0.01$ ), ReMIC( $\beta=0.02$ ), ReMIC( $\beta=0.03$ ), MUFFINN(DNmax) and MUFFINN(DNsum).

| Top                     | CGC      |          |          |          | IntOGen  |          |          |          |
|-------------------------|----------|----------|----------|----------|----------|----------|----------|----------|
|                         | 50       | 100      | 150      | 200      | 50       | 100      | 150      | 200      |
| Proposed                | 4.02e-13 | 6.57e-13 | 2.49e-15 | 5.35e-16 | 2.79e-13 | 3.71e-10 | 7.90e-11 | 1.63e-10 |
| HotNet2                 | 1.97e-15 | 6.57e-13 | 1.79e-11 | 1.81e-10 | 2.79e-13 | 3.71e-10 | 1.32e-09 | 2.71e-08 |
| ReMIC( $\beta = 0.01$ ) | 4.02e-13 | 5.57e-15 | 2.11e-17 | 5.35e-16 | 1.28e-11 | 1.59e-11 | 4.27e-12 | 1.10e-11 |
| ReMIC( $\beta = 0.02$ ) | 5.15e-05 | 5.57e-15 | 2.11e-17 | 5.35e-16 | 2.26e-04 | 1.59e-11 | 4.27e-12 | 1.10e-11 |
| ReMIC( $\beta = 0.03$ ) | 7.17e-02 | 6.57e-13 | 2.35e-13 | 4.94e-18 | 3.35e-03 | 3.71e-10 | 4.27e-12 | 1.10e-11 |
| MUFFINN(DNmax)          | 7.17e-02 | 1.39e-01 | 2.01e-01 | 2.59e-01 | 2.61e-01 | 1.22e-01 | 6.16e-02 | 1.19e-01 |
| MUFFINN(DNsum)          | 7.17e-02 | 1.39e-01 | 6.01e-05 | 1.83e-04 | 2.61e-01 | 1.22e-01 | 2.07e-03 | 7.04e-03 |

**Table S2.** Fisher’s exact test on the top scored candidates of BRCA results for CGC and IntOGen benchmarking genes. The p-values are for the results our proposed method, HotNet2, ReMIC( $\beta=0.01$ ), ReMIC( $\beta=0.02$ ), ReMIC( $\beta=0.03$ ), MUFFINN(DNmax) and MUFFINN(DNsum).

| Top                     | CGC      |          |          |          | IntOGen  |          |          |          |
|-------------------------|----------|----------|----------|----------|----------|----------|----------|----------|
|                         | 50       | 100      | 150      | 200      | 50       | 100      | 150      | 200      |
| Proposed                | 4.35e-18 | 6.62e-21 | 1.61e-18 | 1.56e-20 | 2.03e-19 | 1.06e-28 | 3.79e-34 | 1.44e-34 |
| HotNet2                 | 1.00e-00 | 2.01e-01 | 2.86e-01 | 3.62e-01 | 5.23e-01 | 5.95e-02 | 2.86e-01 | 2.22e-01 |
| ReMIC( $\beta = 0.01$ ) | 7.31e-08 | 5.06e-13 | 7.86e-15 | 1.16e-18 | 5.14e-12 | 7.26e-14 | 3.93e-22 | 1.21e-30 |
| ReMIC( $\beta = 0.02$ ) | 7.31e-08 | 5.06e-13 | 7.86e-15 | 7.38e-17 | 7.60e-15 | 1.42e-17 | 3.93e-22 | 7.07e-27 |
| ReMIC( $\beta = 0.03$ ) | 7.31e-08 | 3.13e-11 | 2.06e-11 | 1.93e-13 | 2.09e-13 | 7.15e-19 | 2.39e-17 | 1.86e-24 |
| MUFFINN(DNmax)          | 1.00e-00 | 1.00e-00 | 1.00e-00 | 1.00e-00 | 1.00e-00 | 1.00e-00 | 7.29e-01 | 1.00e-00 |
| MUFFINN(DNsum)          | 1.00e-00 | 1.00e-00 | 1.00e-00 | 1.00e-00 | 5.23e-01 | 1.82e-01 | 4.86e-01 | 5.42e-01 |

**Table S3.** The full list of the top 200 genes detected by our model on GBM dataset. The table demonstrates the ranks of the genes, gene symbols, mutation rates, the included benchmarking gene lists [1, 2] of the genes and the other methods [5, 6, 7] by which the genes are also detected.

| Rank | Symbol   | MutRate | Benchmarking    | OtherMethod                                                                                              | Rank | Symbol   | MutRate | Benchmarking | OtherMethod                                                                                                                 |
|------|----------|---------|-----------------|----------------------------------------------------------------------------------------------------------|------|----------|---------|--------------|-----------------------------------------------------------------------------------------------------------------------------|
| 1    | TP53     | 37.8%   | CGC;<br>IntOGen | HotNet2;<br>ReMIC( $\beta=0.01$ );<br>ReMIC( $\beta=0.02$ );<br>ReMIC( $\beta=0.03$ )                    | 101  | PROX1    | 1.2%    |              | ReMIC( $\beta=0.01$ );<br>ReMIC( $\beta=0.02$ );<br>MUFFINN(DNsum)                                                          |
| 2    | PTEN     | 35.4%   | CGC;<br>IntOGen | HotNet2;<br>ReMIC( $\beta=0.01$ );<br>ReMIC( $\beta=0.02$ );<br>ReMIC( $\beta=0.03$ )                    | 102  | AXL      | 1.2%    |              | HotNet2;<br>ReMIC( $\beta=0.01$ );<br>ReMIC( $\beta=0.02$ );<br>ReMIC( $\beta=0.03$ );<br>MUFFINN(DNmax);<br>MUFFINN(DNsum) |
| 3    | EGFR     | 18.3%   | CGC;<br>IntOGen | HotNet2;<br>ReMIC( $\beta=0.01$ );<br>ReMIC( $\beta=0.02$ );<br>ReMIC( $\beta=0.03$ )                    | 103  | PTCH1    | 1.2%    |              | HotNet2;<br>ReMIC( $\beta=0.01$ );<br>ReMIC( $\beta=0.02$ );<br>MUFFINN(DNsum)                                              |
| 4    | NF1      | 15.9%   | CGC;<br>IntOGen | ReMIC( $\beta=0.01$ );<br>ReMIC( $\beta=0.02$ );<br>ReMIC( $\beta=0.03$ )                                | 104  | PML      | 1.2%    |              | ReMIC( $\beta=0.01$ );<br>ReMIC( $\beta=0.02$ );<br>ReMIC( $\beta=0.03$ );<br>MUFFINN(DNsum)                                |
| 5    | PIK3R1   | 11.0%   | CGC;<br>IntOGen | HotNet2;<br>ReMIC( $\beta=0.01$ );<br>ReMIC( $\beta=0.02$ );<br>ReMIC( $\beta=0.03$ )                    | 105  | MTOR     | 1.2%    |              | ReMIC( $\beta=0.01$ );<br>ReMIC( $\beta=0.02$ );<br>ReMIC( $\beta=0.03$ );<br>MUFFINN(DNsum)                                |
| 6    | RB1      | 11.0%   | IntOGen         | HotNet2;<br>ReMIC( $\beta=0.01$ );<br>ReMIC( $\beta=0.02$ );<br>ReMIC( $\beta=0.03$ )                    | 106  | ADAM12   | 1.2%    |              | ReMIC( $\beta=0.01$ );<br>ReMIC( $\beta=0.02$ );<br>MUFFINN(DNmax);<br>MUFFINN(DNsum)                                       |
| 7    | ERBB2    | 8.5%    |                 | HotNet2;<br>ReMIC( $\beta=0.01$ );<br>ReMIC( $\beta=0.02$ );<br>ReMIC( $\beta=0.03$ )                    | 107  | MAPK13   | 1.2%    |              | ReMIC( $\beta=0.01$ );<br>ReMIC( $\beta=0.02$ );<br>ReMIC( $\beta=0.03$ );<br>MUFFINN(DNsum)                                |
| 8    | DST      | 7.3%    |                 | ReMIC( $\beta=0.01$ );<br>ReMIC( $\beta=0.02$ );<br>ReMIC( $\beta=0.03$ )                                | 108  | AURKB    | 1.2%    |              | HotNet2;<br>ReMIC( $\beta=0.01$ );<br>ReMIC( $\beta=0.02$ );<br>MUFFINN(DNmax);<br>MUFFINN(DNsum)                           |
| 9    | PIK3CA   | 7.3%    | CGC;<br>IntOGen | HotNet2;<br>ReMIC( $\beta=0.01$ );<br>ReMIC( $\beta=0.02$ );<br>ReMIC( $\beta=0.03$ );<br>MUFFINN(DNsum) | 109  | MDM2     | 1.2%    | CGC          | ReMIC( $\beta=0.01$ );<br>ReMIC( $\beta=0.02$ );<br>ReMIC( $\beta=0.03$ );<br>MUFFINN(DNsum)                                |
| 10   | MSH6     | 4.9%    |                 | HotNet2;<br>ReMIC( $\beta=0.01$ );<br>ReMIC( $\beta=0.02$ );<br>ReMIC( $\beta=0.03$ )                    | 110  | TGFBR2   | 1.2%    | IntOGen      | ReMIC( $\beta=0.01$ );<br>ReMIC( $\beta=0.02$ );<br>MUFFINN(DNsum)                                                          |
| 11   | BCL11A   | 4.9%    |                 | ReMIC( $\beta=0.01$ );<br>ReMIC( $\beta=0.02$ );<br>ReMIC( $\beta=0.03$ );<br>MUFFINN(DNmax)             | 111  | NBN      | 1.2%    |              | ReMIC( $\beta=0.01$ );<br>ReMIC( $\beta=0.02$ );<br>ReMIC( $\beta=0.03$ );<br>MUFFINN(DNsum)                                |
| 12   | ITGB3    | 3.7%    |                 | HotNet2;<br>ReMIC( $\beta=0.01$ );<br>ReMIC( $\beta=0.02$ );<br>ReMIC( $\beta=0.03$ )                    | 112  | CD46     | 1.2%    |              | MUFFINN(DNmax);<br>MUFFINN(DNsum)                                                                                           |
| 13   | FN1      | 3.7%    | IntOGen         | HotNet2;<br>ReMIC( $\beta=0.01$ );<br>ReMIC( $\beta=0.02$ );<br>ReMIC( $\beta=0.03$ )                    | 113  | RTN1     | 1.2%    |              | MUFFINN(DNsum)                                                                                                              |
| 14   | BRCA2    | 3.7%    |                 | HotNet2;<br>ReMIC( $\beta=0.01$ );<br>ReMIC( $\beta=0.02$ );<br>ReMIC( $\beta=0.03$ )                    | 114  | ID3      | 1.2%    |              | ReMIC( $\beta=0.01$ );<br>ReMIC( $\beta=0.02$ );<br>MUFFINN(DNsum)                                                          |
| 15   | CHEK2    | 3.7%    |                 | HotNet2;<br>ReMIC( $\beta=0.01$ );<br>ReMIC( $\beta=0.02$ );<br>ReMIC( $\beta=0.03$ )                    | 115  | DGKD     | 1.2%    |              | ReMIC( $\beta=0.01$ );<br>MUFFINN(DNsum)                                                                                    |
| 16   | EP300    | 3.7%    |                 | ReMIC( $\beta=0.01$ );<br>ReMIC( $\beta=0.02$ );<br>ReMIC( $\beta=0.03$ )                                | 116  | CTSH     | 1.2%    |              | MUFFINN(DNsum)                                                                                                              |
| 17   | CDKN2A   | 3.7%    |                 | HotNet2;<br>ReMIC( $\beta=0.01$ );<br>ReMIC( $\beta=0.02$ );<br>ReMIC( $\beta=0.03$ )                    | 117  | ASPM     | 1.2%    |              | HotNet2;<br>ReMIC( $\beta=0.01$ );<br>ReMIC( $\beta=0.02$ );<br>ReMIC( $\beta=0.03$ )                                       |
| 18   | TNC      | 3.7%    |                 | HotNet2;<br>ReMIC( $\beta=0.01$ );<br>ReMIC( $\beta=0.02$ );<br>ReMIC( $\beta=0.03$ )                    | 118  | ARNT     | 1.2%    |              | HotNet2;<br>ReMIC( $\beta=0.01$ );<br>ReMIC( $\beta=0.02$ );<br>ReMIC( $\beta=0.03$ );<br>MUFFINN(DNmax);<br>MUFFINN(DNsum) |
| 19   | TNK2     | 3.7%    |                 | HotNet2;<br>ReMIC( $\beta=0.01$ );<br>ReMIC( $\beta=0.02$ );<br>ReMIC( $\beta=0.03$ )                    | 119  | PRKD2    | 1.2%    |              | ReMIC( $\beta=0.01$ );<br>ReMIC( $\beta=0.02$ );<br>ReMIC( $\beta=0.03$ );<br>MUFFINN(DNmax);<br>MUFFINN(DNsum)             |
| 20   | FURIN    | 2.4%    |                 | HotNet2;<br>ReMIC( $\beta=0.01$ );<br>ReMIC( $\beta=0.02$ );<br>ReMIC( $\beta=0.03$ )                    | 120  | ANXA7    | 1.2%    |              | ReMIC( $\beta=0.01$ );<br>MUFFINN(DNmax);<br>MUFFINN(DNsum)                                                                 |
| 21   | PRKCZ    | 2.4%    |                 | ReMIC( $\beta=0.01$ );<br>ReMIC( $\beta=0.02$ );<br>ReMIC( $\beta=0.03$ )                                | 121  | TNFRSF1B | 1.2%    |              | ReMIC( $\beta=0.01$ );<br>ReMIC( $\beta=0.02$ );<br>MUFFINN(DNsum)                                                          |
| 22   | PDGFRB   | 2.4%    |                 | HotNet2;<br>ReMIC( $\beta=0.01$ );<br>ReMIC( $\beta=0.02$ );<br>ReMIC( $\beta=0.03$ )                    | 122  | RINT1    | 1.2%    |              | ReMIC( $\beta=0.01$ );<br>MUFFINN(DNsum)                                                                                    |
| 23   | ITGB2    | 2.4%    |                 | ReMIC( $\beta=0.01$ );<br>ReMIC( $\beta=0.02$ );<br>ReMIC( $\beta=0.03$ )                                | 123  | RUNX1T1  | 1.2%    |              | ReMIC( $\beta=0.01$ );<br>ReMIC( $\beta=0.02$ );<br>ReMIC( $\beta=0.03$ );<br>MUFFINN(DNsum)                                |
| 24   | HSP90AA1 | 2.4%    |                 | ReMIC( $\beta=0.01$ );<br>ReMIC( $\beta=0.02$ );<br>ReMIC( $\beta=0.03$ )                                | 124  | TRIM33   | 1.2%    |              | ReMIC( $\beta=0.01$ );<br>ReMIC( $\beta=0.02$ );<br>MUFFINN(DNsum)                                                          |
| 25   | TRRAP    | 2.4%    |                 | ReMIC( $\beta=0.01$ );<br>ReMIC( $\beta=0.02$ );<br>ReMIC( $\beta=0.03$ )                                | 125  | ST7      | 1.2%    |              | ReMIC( $\beta=0.01$ );<br>MUFFINN(DNsum)                                                                                    |

|    |        |      |         |                                                                                       |     |          |      |         |                                                                                                                             |
|----|--------|------|---------|---------------------------------------------------------------------------------------|-----|----------|------|---------|-----------------------------------------------------------------------------------------------------------------------------|
| 26 | MLH1   | 2.4% |         | ReMIC( $\beta=0.01$ );<br>ReMIC( $\beta=0.02$ );<br>ReMIC( $\beta=0.03$ )             | 126 | CHEK1    | 1.2% |         | ReMIC( $\beta=0.01$ );<br>ReMIC( $\beta=0.02$ );<br>ReMIC( $\beta=0.03$ );<br>MUFFINN(DNsum)<br>HotNet2;                    |
| 27 | MAPK9  | 2.4% |         | HotNet2;<br>ReMIC( $\beta=0.01$ );<br>ReMIC( $\beta=0.02$ );<br>ReMIC( $\beta=0.03$ ) | 127 | GLI3     | 1.2% |         | ReMIC( $\beta=0.01$ );<br>ReMIC( $\beta=0.02$ );<br>MUFFINN(DNsum)                                                          |
| 28 | A2M    | 2.4% |         | HotNet2;<br>ReMIC( $\beta=0.01$ );<br>ReMIC( $\beta=0.02$ );<br>ReMIC( $\beta=0.03$ ) | 128 | TIMP2    | 1.2% |         | MUFFINN(DNmax);<br>MUFFINN(DNsum)                                                                                           |
| 29 | PRKDC  | 2.4% |         | ReMIC( $\beta=0.01$ );<br>ReMIC( $\beta=0.02$ );<br>ReMIC( $\beta=0.03$ )             | 129 | MTAP     | 1.2% |         | MUFFINN(DNsum)                                                                                                              |
| 30 | BCR    | 2.4% |         | HotNet2;<br>ReMIC( $\beta=0.01$ );<br>ReMIC( $\beta=0.02$ );<br>ReMIC( $\beta=0.03$ ) | 130 | KIT      | 1.2% |         | ReMIC( $\beta=0.01$ );<br>ReMIC( $\beta=0.02$ );<br>ReMIC( $\beta=0.03$ );<br>MUFFINN(DNsum)                                |
| 31 | IRS1   | 2.4% |         | HotNet2;<br>ReMIC( $\beta=0.01$ );<br>ReMIC( $\beta=0.02$ );<br>ReMIC( $\beta=0.03$ ) | 131 | TSC1     | 1.2% |         | ReMIC( $\beta=0.01$ );<br>ReMIC( $\beta=0.02$ );<br>ReMIC( $\beta=0.03$ );<br>MUFFINN(DNsum)                                |
| 32 | ING4   | 2.4% |         | HotNet2;<br>ReMIC( $\beta=0.01$ );<br>ReMIC( $\beta=0.02$ );<br>ReMIC( $\beta=0.03$ ) | 132 | ADAM15   | 1.2% |         | MUFFINN(DNmax);<br>MUFFINN(DNsum)                                                                                           |
| 33 | TAF1   | 2.4% |         | HotNet2;<br>ReMIC( $\beta=0.01$ );<br>ReMIC( $\beta=0.02$ );<br>ReMIC( $\beta=0.03$ ) | 133 | DHTKD1   | 1.2% |         | MUFFINN(DNsum)                                                                                                              |
| 34 | FBXW7  | 2.4% |         | HotNet2;<br>ReMIC( $\beta=0.01$ );<br>ReMIC( $\beta=0.02$ );<br>ReMIC( $\beta=0.03$ ) | 134 | EPHA2    | 1.2% |         | HotNet2;<br>ReMIC( $\beta=0.01$ );<br>ReMIC( $\beta=0.02$ );<br>ReMIC( $\beta=0.03$ );<br>MUFFINN(DNsum)                    |
| 35 | MSH2   | 2.4% |         | HotNet2;<br>ReMIC( $\beta=0.01$ );<br>ReMIC( $\beta=0.02$ );<br>ReMIC( $\beta=0.03$ ) | 135 | CASP9    | 1.2% |         | ReMIC( $\beta=0.01$ );<br>ReMIC( $\beta=0.02$ );<br>ReMIC( $\beta=0.03$ );<br>MUFFINN(DNsum)                                |
| 36 | NOTCH1 | 2.4% |         | HotNet2;<br>ReMIC( $\beta=0.01$ );<br>ReMIC( $\beta=0.02$ );<br>ReMIC( $\beta=0.03$ ) | 136 | DCX      | 1.2% |         | ReMIC( $\beta=0.01$ );<br>MUFFINN(DNsum)                                                                                    |
| 37 | ROR2   | 2.4% |         | ReMIC( $\beta=0.01$ );<br>ReMIC( $\beta=0.02$ );<br>ReMIC( $\beta=0.03$ )             | 137 | PRKCB    | 1.2% |         | ReMIC( $\beta=0.01$ );<br>ReMIC( $\beta=0.02$ );<br>ReMIC( $\beta=0.03$ );<br>MUFFINN(DNsum)                                |
| 38 | CENPF  | 2.4% |         | ReMIC( $\beta=0.01$ );<br>ReMIC( $\beta=0.02$ );<br>ReMIC( $\beta=0.03$ )             | 138 | IL1RL1   | 1.2% |         | MUFFINN(DNsum)                                                                                                              |
| 39 | EPHA7  | 2.4% |         | ReMIC( $\beta=0.01$ );<br>ReMIC( $\beta=0.02$ );<br>ReMIC( $\beta=0.03$ )             | 139 | DOCK1    | 1.2% |         | ReMIC( $\beta=0.01$ );<br>ReMIC( $\beta=0.02$ )                                                                             |
| 40 | IQGAP1 | 2.4% |         | ReMIC( $\beta=0.01$ );<br>ReMIC( $\beta=0.02$ );<br>ReMIC( $\beta=0.03$ )             | 140 | TRIM24   | 1.2% |         | ReMIC( $\beta=0.01$ );<br>ReMIC( $\beta=0.02$ );<br>MUFFINN(DNsum)                                                          |
| 41 | MET    | 2.4% | IntOGen | HotNet2;<br>ReMIC( $\beta=0.01$ );<br>ReMIC( $\beta=0.02$ );<br>ReMIC( $\beta=0.03$ ) | 141 | PDGFRA   | 1.2% | CGC     | HotNet2;<br>ReMIC( $\beta=0.01$ );<br>ReMIC( $\beta=0.02$ );<br>ReMIC( $\beta=0.03$ );<br>MUFFINN(DNsum)                    |
| 42 | LTF    | 2.4% |         | ReMIC( $\beta=0.01$ );<br>ReMIC( $\beta=0.02$ );<br>ReMIC( $\beta=0.03$ )             | 142 | POU2F1   | 1.2% |         | ReMIC( $\beta=0.01$ );<br>ReMIC( $\beta=0.02$ );<br>MUFFINN(DNsum)                                                          |
| 43 | BCAR1  | 2.4% |         | HotNet2;<br>ReMIC( $\beta=0.01$ );<br>ReMIC( $\beta=0.02$ );<br>ReMIC( $\beta=0.03$ ) | 143 | KRAS     | 1.2% | IntOGen | HotNet2;<br>ReMIC( $\beta=0.01$ );<br>ReMIC( $\beta=0.02$ );<br>ReMIC( $\beta=0.03$ );<br>MUFFINN(DNsum)                    |
| 44 | PTPN11 | 2.4% | IntOGen | ReMIC( $\beta=0.01$ );<br>ReMIC( $\beta=0.02$ );<br>ReMIC( $\beta=0.03$ )             | 144 | CNTFR    | 1.2% |         | MUFFINN(DNsum)                                                                                                              |
| 45 | KLF6   | 2.4% | CGC     | HotNet2;<br>ReMIC( $\beta=0.01$ );<br>ReMIC( $\beta=0.02$ );<br>ReMIC( $\beta=0.03$ ) | 145 | PIM1     | 1.2% |         | ReMIC( $\beta=0.01$ );<br>ReMIC( $\beta=0.02$ );<br>MUFFINN(DNmax);<br>MUFFINN(DNsum)                                       |
| 46 | TCF12  | 2.4% |         | ReMIC( $\beta=0.01$ );<br>ReMIC( $\beta=0.02$ );<br>ReMIC( $\beta=0.03$ )             | 146 | RPS6KA3  | 1.2% |         | ReMIC( $\beta=0.01$ );<br>MUFFINN(DNsum)                                                                                    |
| 47 | GATA3  | 2.4% |         | ReMIC( $\beta=0.01$ );<br>ReMIC( $\beta=0.02$ );<br>ReMIC( $\beta=0.03$ )             | 147 | TRIM2    | 1.2% |         | MUFFINN(DNsum)                                                                                                              |
| 48 | COL1A1 | 2.4% |         | HotNet2;<br>ReMIC( $\beta=0.01$ );<br>ReMIC( $\beta=0.02$ );<br>ReMIC( $\beta=0.03$ ) | 148 | COL1A2   | 1.2% |         | HotNet2;<br>ReMIC( $\beta=0.01$ );<br>ReMIC( $\beta=0.02$ );<br>ReMIC( $\beta=0.03$ );<br>MUFFINN(DNmax);<br>MUFFINN(DNsum) |
| 49 | NMBR   | 2.4% |         | ReMIC( $\beta=0.01$ );<br>ReMIC( $\beta=0.02$ );<br>ReMIC( $\beta=0.03$ )             | 149 | EPHA4    | 1.2% |         | MUFFINN(DNsum)                                                                                                              |
| 50 | BAI3   | 2.4% |         | ReMIC( $\beta=0.01$ );<br>ReMIC( $\beta=0.02$ );<br>ReMIC( $\beta=0.03$ )             | 150 | SNX13    | 1.2% |         | ReMIC( $\beta=0.01$ );<br>ReMIC( $\beta=0.02$ );<br>MUFFINN(DNsum)                                                          |
| 51 | FLI1   | 2.4% |         | ReMIC( $\beta=0.01$ );<br>ReMIC( $\beta=0.02$ );<br>ReMIC( $\beta=0.03$ )             | 151 | LGALS3BP | 1.2% |         | HotNet2;<br>ReMIC( $\beta=0.01$ );<br>ReMIC( $\beta=0.02$ );<br>MUFFINN(DNsum)                                              |
| 52 | LDHA   | 2.4% |         | ReMIC( $\beta=0.01$ );<br>ReMIC( $\beta=0.02$ );<br>ReMIC( $\beta=0.03$ )             | 152 | MDM4     | 1.2% | CGC     | ReMIC( $\beta=0.01$ );<br>ReMIC( $\beta=0.02$ );<br>ReMIC( $\beta=0.03$ );<br>MUFFINN(DNmax);<br>MUFFINN(DNsum)             |
| 53 | TSC2   | 2.4% |         | HotNet2;<br>ReMIC( $\beta=0.01$ );<br>ReMIC( $\beta=0.02$ );<br>ReMIC( $\beta=0.03$ ) | 153 | ANXA1    | 1.2% |         | HotNet2;<br>ReMIC( $\beta=0.01$ );<br>ReMIC( $\beta=0.02$ );<br>ReMIC( $\beta=0.03$ );<br>MUFFINN(DNmax);<br>MUFFINN(DNsum) |
| 54 | TERT   | 2.4% | Novel   | ReMIC( $\beta=0.01$ );<br>ReMIC( $\beta=0.02$ );<br>ReMIC( $\beta=0.03$ )             | 154 | MAPK7    | 1.2% |         | ReMIC( $\beta=0.01$ );<br>MUFFINN(DNsum)                                                                                    |

|    |         |      |     |                                                                                                                             |     |           |      |                                                                                                                             |
|----|---------|------|-----|-----------------------------------------------------------------------------------------------------------------------------|-----|-----------|------|-----------------------------------------------------------------------------------------------------------------------------|
| 55 | LAMP1   | 2.4% |     | ReMIC( $\beta=0.01$ );<br>ReMIC( $\beta=0.02$ );<br>ReMIC( $\beta=0.03$ )<br>HotNet2;                                       | 155 | NDUFA10   | 1.2% | ReMIC( $\beta=0.01$ );<br>MUFFINN(DNsum)                                                                                    |
| 56 | COL3A1  | 2.4% |     | ReMIC( $\beta=0.01$ );<br>ReMIC( $\beta=0.02$ );<br>ReMIC( $\beta=0.03$ )<br>HotNet2;                                       | 156 | MEOX2     | 1.2% | MUFFINN(DNmax);<br>MUFFINN(DNsum)                                                                                           |
| 57 | ABCC4   | 2.4% |     | ReMIC( $\beta=0.01$ );<br>ReMIC( $\beta=0.02$ );<br>ReMIC( $\beta=0.03$ )<br>ReMIC( $\beta=0.01$ );                         | 157 | SLC25A13  | 1.2% | ReMIC( $\beta=0.01$ );<br>MUFFINN(DNmax);<br>MUFFINN(DNsum)                                                                 |
| 58 | EP400   | 2.4% |     | ReMIC( $\beta=0.02$ );<br>ReMIC( $\beta=0.03$ )<br>HotNet2;                                                                 | 158 | KIF3B     | 1.2% | MUFFINN(DNsum)                                                                                                              |
| 59 | ROS1    | 2.4% | CGC | ReMIC( $\beta=0.01$ );<br>ReMIC( $\beta=0.02$ );<br>ReMIC( $\beta=0.03$ )<br>ReMIC( $\beta=0.01$ );                         | 159 | FLT4      | 1.2% | ReMIC( $\beta=0.01$ );<br>ReMIC( $\beta=0.02$ );<br>ReMIC( $\beta=0.03$ );<br>MUFFINN(DNsum)                                |
| 60 | SIK2    | 2.4% |     | ReMIC( $\beta=0.02$ );<br>ReMIC( $\beta=0.03$ )<br>ReMIC( $\beta=0.01$ );                                                   | 160 | UNG       | 1.2% | ReMIC( $\beta=0.01$ );<br>MUFFINN(DNsum)                                                                                    |
| 61 | AGAP2   | 2.4% |     | ReMIC( $\beta=0.02$ );<br>ReMIC( $\beta=0.03$ )<br>ReMIC( $\beta=0.01$ );                                                   | 161 | NELL2     | 1.2% | ReMIC( $\beta=0.01$ );<br>MUFFINN(DNsum)                                                                                    |
| 62 | MSI1    | 2.4% |     | ReMIC( $\beta=0.02$ );<br>ReMIC( $\beta=0.03$ )<br>ReMIC( $\beta=0.01$ );                                                   | 162 | APBB1IP   | 1.2% | MUFFINN(DNmax);<br>MUFFINN(DNsum)                                                                                           |
| 63 | KAT6B   | 2.4% |     | ReMIC( $\beta=0.02$ );<br>ReMIC( $\beta=0.03$ )<br>ReMIC( $\beta=0.01$ );                                                   | 163 | GYPC      | 1.2% | ReMIC( $\beta=0.01$ );<br>MUFFINN(DNsum)                                                                                    |
| 64 | TRIM3   | 2.4% |     | ReMIC( $\beta=0.02$ );<br>ReMIC( $\beta=0.03$ )<br>ReMIC( $\beta=0.01$ );                                                   | 164 | WNT2      | 1.2% | MUFFINN(DNmax);<br>MUFFINN(DNsum)                                                                                           |
| 65 | SOX11   | 2.4% |     | ReMIC( $\beta=0.02$ );<br>ReMIC( $\beta=0.03$ )<br>ReMIC( $\beta=0.01$ );                                                   | 165 | SYP       | 1.2% | ReMIC( $\beta=0.01$ );<br>MUFFINN(DNsum)                                                                                    |
| 66 | SLC12A6 | 2.4% |     | ReMIC( $\beta=0.02$ );<br>ReMIC( $\beta=0.03$ )<br>ReMIC( $\beta=0.01$ );                                                   | 166 | ZNF384    | 1.2% | ReMIC( $\beta=0.01$ )                                                                                                       |
| 67 | CTNNB1  | 1.2% |     | ReMIC( $\beta=0.02$ );<br>ReMIC( $\beta=0.03$ )<br>MUFFINN(DNsum)                                                           | 167 | KLF4      | 1.2% | HotNet2;<br>ReMIC( $\beta=0.01$ );<br>ReMIC( $\beta=0.02$ );<br>ReMIC( $\beta=0.03$ )                                       |
| 68 | BCL2    | 1.2% |     | ReMIC( $\beta=0.01$ );<br>ReMIC( $\beta=0.02$ );<br>ReMIC( $\beta=0.03$ );<br>MUFFINN(DNmax);<br>MUFFINN(DNsum)             | 168 | CCNB1     | 1.2% | ReMIC( $\beta=0.01$ );<br>ReMIC( $\beta=0.02$ );<br>ReMIC( $\beta=0.03$ );<br>MUFFINN(DNsum)                                |
| 69 | USF1    | 1.2% |     | ReMIC( $\beta=0.01$ );<br>ReMIC( $\beta=0.02$ );<br>ReMIC( $\beta=0.03$ );<br>MUFFINN(DNsum)                                | 169 | KTN1      | 1.2% | ReMIC( $\beta=0.01$ );<br>MUFFINN(DNsum)                                                                                    |
| 70 | GNAS    | 1.2% |     | ReMIC( $\beta=0.01$ );<br>MUFFINN(DNsum)                                                                                    | 170 | KPNA2     | 1.2% | ReMIC( $\beta=0.01$ );<br>ReMIC( $\beta=0.02$ );<br>ReMIC( $\beta=0.03$ );<br>MUFFINN(DNsum)                                |
| 71 | STK36   | 1.2% |     | HotNet2;<br>ReMIC( $\beta=0.01$ );<br>ReMIC( $\beta=0.02$ );<br>ReMIC( $\beta=0.03$ );<br>MUFFINN(DNmax);<br>MUFFINN(DNsum) | 171 | ELAVL2    | 1.2% | ReMIC( $\beta=0.01$ );<br>MUFFINN(DNsum)                                                                                    |
| 72 | CBL     | 1.2% |     | ReMIC( $\beta=0.01$ );<br>ReMIC( $\beta=0.02$ );<br>ReMIC( $\beta=0.03$ )<br>ReMIC( $\beta=0.01$ );                         | 172 | DTX3      | 1.2% | MUFFINN(DNsum)                                                                                                              |
| 73 | BAX     | 1.2% |     | ReMIC( $\beta=0.02$ );<br>MUFFINN(DNmax);<br>MUFFINN(DNsum)                                                                 | 173 | CDC123    | 1.2% | MUFFINN(DNmax);<br>MUFFINN(DNsum)                                                                                           |
| 74 | ILK     | 1.2% |     | ReMIC( $\beta=0.01$ );<br>ReMIC( $\beta=0.02$ );<br>ReMIC( $\beta=0.03$ );<br>MUFFINN(DNsum)                                | 174 | NRAS      | 1.2% | ReMIC( $\beta=0.01$ );<br>MUFFINN(DNsum)                                                                                    |
| 75 | ERBB3   | 1.2% |     | ReMIC( $\beta=0.01$ );<br>ReMIC( $\beta=0.02$ );<br>ReMIC( $\beta=0.03$ );<br>MUFFINN(DNmax);<br>MUFFINN(DNsum)             | 175 | PPP2R5D   | 1.2% | HotNet2;<br>ReMIC( $\beta=0.01$ );<br>ReMIC( $\beta=0.02$ );<br>MUFFINN(DNsum)                                              |
| 76 | SMAD4   | 1.2% |     | ReMIC( $\beta=0.01$ );<br>ReMIC( $\beta=0.02$ );<br>ReMIC( $\beta=0.03$ );<br>MUFFINN(DNmax);<br>MUFFINN(DNsum)             | 176 | FGFR1     | 1.2% | ReMIC( $\beta=0.01$ );<br>ReMIC( $\beta=0.02$ );<br>ReMIC( $\beta=0.03$ );<br>MUFFINN(DNsum)                                |
| 77 | STAT1   | 1.2% |     | ReMIC( $\beta=0.01$ );<br>ReMIC( $\beta=0.02$ );<br>ReMIC( $\beta=0.03$ );<br>MUFFINN(DNsum)                                | 177 | TNFRSF11B | 1.2% | MUFFINN(DNsum)                                                                                                              |
| 78 | LYN     | 1.2% |     | ReMIC( $\beta=0.01$ );<br>ReMIC( $\beta=0.02$ );<br>ReMIC( $\beta=0.03$ );<br>MUFFINN(DNsum)                                | 178 | CAST      | 1.2% | HotNet2;<br>ReMIC( $\beta=0.01$ );<br>ReMIC( $\beta=0.02$ );<br>ReMIC( $\beta=0.03$ );<br>MUFFINN(DNsum)                    |
| 79 | PRKCD   | 1.2% |     | ReMIC( $\beta=0.01$ );<br>ReMIC( $\beta=0.02$ );<br>ReMIC( $\beta=0.03$ );<br>MUFFINN(DNsum)                                | 179 | TAOK3     | 1.2% | ReMIC( $\beta=0.01$ );<br>MUFFINN(DNsum)                                                                                    |
| 80 | WEE1    | 1.2% |     | ReMIC( $\beta=0.01$ );<br>ReMIC( $\beta=0.03$ );<br>MUFFINN(DNsum)                                                          | 180 | GRIA2     | 1.2% | MUFFINN(DNsum)                                                                                                              |
| 81 | PRKCA   | 1.2% |     | ReMIC( $\beta=0.01$ );<br>ReMIC( $\beta=0.02$ );<br>ReMIC( $\beta=0.03$ );<br>MUFFINN(DNmax);<br>MUFFINN(DNsum)             | 181 | FOXO4     | 1.2% | ReMIC( $\beta=0.01$ );<br>ReMIC( $\beta=0.02$ );<br>ReMIC( $\beta=0.03$ );<br>MUFFINN(DNmax);<br>MUFFINN(DNsum)             |
| 82 | FGFR2   | 1.2% |     | HotNet2;<br>ReMIC( $\beta=0.01$ );<br>ReMIC( $\beta=0.02$ );<br>MUFFINN(DNsum)                                              | 182 | MYCN      | 1.2% | HotNet2;<br>ReMIC( $\beta=0.01$ );<br>ReMIC( $\beta=0.02$ );<br>ReMIC( $\beta=0.03$ );<br>MUFFINN(DNmax);<br>MUFFINN(DNsum) |

|     |          |      |  |                                                                                                                 |     |          |      |         |                                                                                                                             |
|-----|----------|------|--|-----------------------------------------------------------------------------------------------------------------|-----|----------|------|---------|-----------------------------------------------------------------------------------------------------------------------------|
| 83  | NOS3     | 1.2% |  | ReMIC( $\beta=0.01$ );<br>ReMIC( $\beta=0.02$ )                                                                 | 183 | PMS2     | 1.2% |         | ReMIC( $\beta=0.01$ );<br>ReMIC( $\beta=0.02$ );<br>ReMIC( $\beta=0.03$ );<br>MUFFINN(DNmax);<br>MUFFINN(DNsum)             |
| 84  | SHH      | 1.2% |  | HotNet2;<br>ReMIC( $\beta=0.01$ );<br>MUFFINN(DNsum)                                                            | 184 | PLAG1    | 1.2% |         | ReMIC( $\beta=0.01$ );<br>ReMIC( $\beta=0.02$ );<br>ReMIC( $\beta=0.03$ );<br>MUFFINN(DNsum)                                |
| 85  | ATP6V1E1 | 1.2% |  | ReMIC( $\beta=0.01$ );<br>ReMIC( $\beta=0.02$ );<br>MUFFINN(DNmax);<br>MUFFINN(DNsum)                           | 185 | MYLK2    | 1.2% |         | ReMIC( $\beta=0.01$ );<br>MUFFINN(DNsum)                                                                                    |
| 86  | ATR      | 1.2% |  | ReMIC( $\beta=0.01$ );<br>ReMIC( $\beta=0.02$ );<br>ReMIC( $\beta=0.03$ );<br>MUFFINN(DNmax);<br>MUFFINN(DNsum) | 186 | LAX1     | 1.2% |         | ReMIC( $\beta=0.01$ );<br>MUFFINN(DNmax);<br>MUFFINN(DNsum)                                                                 |
| 87  | VAV2     | 1.2% |  | ReMIC( $\beta=0.01$ );<br>ReMIC( $\beta=0.02$ );<br>ReMIC( $\beta=0.03$ );<br>MUFFINN(DNmax);<br>MUFFINN(DNsum) | 187 | GLI1     | 1.2% |         | HotNet2;<br>ReMIC( $\beta=0.01$ );<br>MUFFINN(DNsum)                                                                        |
| 88  | TOP1     | 1.2% |  | ReMIC( $\beta=0.01$ );<br>ReMIC( $\beta=0.02$ );<br>ReMIC( $\beta=0.03$ );<br>MUFFINN(DNsum)                    | 188 | AVIL     | 1.2% |         | ReMIC( $\beta=0.01$ );<br>ReMIC( $\beta=0.02$ );<br>MUFFINN(DNmax);<br>MUFFINN(DNsum)                                       |
| 89  | CSNK1E   | 1.2% |  | ReMIC( $\beta=0.01$ );<br>ReMIC( $\beta=0.02$ );<br>ReMIC( $\beta=0.03$ );<br>MUFFINN(DNsum)                    | 189 | NTRK3    | 1.2% |         | ReMIC( $\beta=0.01$ );<br>MUFFINN(DNsum)                                                                                    |
| 90  | CYLD     | 1.2% |  | ReMIC( $\beta=0.01$ );<br>ReMIC( $\beta=0.02$ );<br>MUFFINN(DNmax);<br>MUFFINN(DNsum)                           | 190 | JAG1     | 1.2% |         | HotNet2;<br>ReMIC( $\beta=0.01$ );<br>ReMIC( $\beta=0.02$ );<br>MUFFINN(DNsum)                                              |
| 91  | STAT3    | 1.2% |  | ReMIC( $\beta=0.01$ );<br>ReMIC( $\beta=0.02$ );<br>ReMIC( $\beta=0.03$ );<br>MUFFINN(DNsum)                    | 191 | BAMBI    | 1.2% |         | ReMIC( $\beta=0.01$ );<br>MUFFINN(DNmax);<br>MUFFINN(DNsum)                                                                 |
| 92  | SPARC    | 1.2% |  | HotNet2;<br>ReMIC( $\beta=0.01$ );<br>ReMIC( $\beta=0.02$ );<br>ReMIC( $\beta=0.03$ );<br>MUFFINN(DNsum)        | 192 | CHL1     | 1.2% |         | ReMIC( $\beta=0.01$ );<br>ReMIC( $\beta=0.02$ );<br>MUFFINN(DNsum)                                                          |
| 93  | RPN1     | 1.2% |  | MUFFINN(DNsum)                                                                                                  | 193 | EPG5     | 1.2% |         | ReMIC( $\beta=0.01$ );<br>MUFFINN(DNsum)                                                                                    |
| 94  | ATM      | 1.2% |  | ReMIC( $\beta=0.01$ );<br>ReMIC( $\beta=0.02$ );<br>ReMIC( $\beta=0.03$ )                                       | 194 | CDKL5    | 1.2% |         | ReMIC( $\beta=0.01$ );<br>MUFFINN(DNsum)                                                                                    |
| 95  | PHLPP1   | 1.2% |  | MUFFINN(DNsum)                                                                                                  | 195 | CYP3A4   | 1.2% |         | ReMIC( $\beta=0.01$ );<br>MUFFINN(DNsum)                                                                                    |
| 96  | TBK1     | 1.2% |  | ReMIC( $\beta=0.01$ );<br>ReMIC( $\beta=0.02$ );<br>ReMIC( $\beta=0.03$ );<br>MUFFINN(DNmax);<br>MUFFINN(DNsum) | 196 | SLC2A2   | 1.2% |         | ReMIC( $\beta=0.01$ );<br>ReMIC( $\beta=0.02$ );<br>MUFFINN(DNsum)                                                          |
| 97  | SOCS1    | 1.2% |  | ReMIC( $\beta=0.01$ );<br>ReMIC( $\beta=0.02$ );<br>ReMIC( $\beta=0.03$ );<br>MUFFINN(DNmax);<br>MUFFINN(DNsum) | 197 | COL6A2   | 1.2% |         | ReMIC( $\beta=0.01$ );<br>MUFFINN(DNmax);<br>MUFFINN(DNsum)                                                                 |
| 98  | UPF2     | 1.2% |  | MUFFINN(DNsum)                                                                                                  | 198 | ARHGAP35 | 1.2% | IntOGen | ReMIC( $\beta=0.01$ );<br>MUFFINN(DNmax);<br>MUFFINN(DNsum)                                                                 |
| 99  | INSR     | 1.2% |  | ReMIC( $\beta=0.01$ );<br>ReMIC( $\beta=0.02$ );<br>ReMIC( $\beta=0.03$ );<br>MUFFINN(DNsum)                    | 199 | DMBT1    | 1.2% |         | ReMIC( $\beta=0.01$ );<br>MUFFINN(DNsum)                                                                                    |
| 100 | AIFM1    | 1.2% |  | ReMIC( $\beta=0.01$ );<br>ReMIC( $\beta=0.02$ );<br>MUFFINN(DNmax);<br>MUFFINN(DNsum)                           | 200 | FLT1     | 1.2% |         | HotNet2;<br>ReMIC( $\beta=0.01$ );<br>ReMIC( $\beta=0.02$ );<br>ReMIC( $\beta=0.03$ );<br>MUFFINN(DNmax);<br>MUFFINN(DNsum) |

**Table S4.** The full list of the top 200 genes detected by our model on COADREAD dataset. The table demonstrates the ranks of the genes, gene symbols, mutation rates, the included benchmarking gene lists [1, 2] of the genes and the other methods [5, 6, 7] by which the genes are also detected.

| Rank | Symbol | MutRate | Benchmarking    | OtherMethod                                                                           | Rank | Symbol  | MutRate | Benchmarking | OtherMethod                                                               |
|------|--------|---------|-----------------|---------------------------------------------------------------------------------------|------|---------|---------|--------------|---------------------------------------------------------------------------|
| 1    | APC    | 77.3%   | CGC;<br>IntOGen | HotNet2;<br>ReMIC( $\beta=0.01$ );<br>ReMIC( $\beta=0.02$ );<br>ReMIC( $\beta=0.03$ ) | 101  | DNM1    | 7.2%    |              | ReMIC( $\beta=0.01$ );<br>ReMIC( $\beta=0.02$ );<br>ReMIC( $\beta=0.03$ ) |
| 2    | TP53   | 54.6%   | CGC;<br>IntOGen |                                                                                       | 102  | TNR     | 8.2%    |              |                                                                           |
| 3    | KRAS   | 42.0%   | CGC;<br>IntOGen | HotNet2                                                                               | 103  | COL12A1 | 10.6%   |              | ReMIC( $\beta=0.01$ );<br>ReMIC( $\beta=0.02$ );<br>ReMIC( $\beta=0.03$ ) |
| 4    | TTN    | 40.1%   |                 |                                                                                       | 104  | LRP6    | 7.2%    | CGC          | HotNet2                                                                   |
| 5    | SYNE1  | 28.5%   |                 |                                                                                       | 105  | IGF2R   | 8.7%    |              |                                                                           |
| 6    | MUC16  | 20.3%   |                 |                                                                                       | 106  | MSH6    | 8.7%    |              |                                                                           |
| 7    | LRP1B  | 21.7%   |                 |                                                                                       | 107  | PCLO    | 8.7%    |              |                                                                           |
| 8    | PIK3CA | 18.4%   | CGC;<br>IntOGen |                                                                                       | 108  | VWF     | 8.7%    |              |                                                                           |
| 9    | LRP2   | 17.4%   |                 |                                                                                       | 109  | SLX4    | 6.8%    |              |                                                                           |
| 10   | FBXW7  | 16.9%   | CGC;<br>IntOGen | ReMIC( $\beta=0.01$ );<br>ReMIC( $\beta=0.02$ )                                       | 110  | TRRAP   | 7.7%    |              |                                                                           |
| 11   | DMD    | 16.9%   |                 | HotNet2;<br>ReMIC( $\beta=0.01$ );<br>ReMIC( $\beta=0.02$ );<br>ReMIC( $\beta=0.03$ ) | 111  | EVC2    | 11.1%   |              | ReMIC( $\beta=0.01$ );<br>ReMIC( $\beta=0.02$ );<br>ReMIC( $\beta=0.03$ ) |
| 12   | FLG    | 16.9%   |                 | ReMIC( $\beta=0.01$ );<br>ReMIC( $\beta=0.02$ );<br>ReMIC( $\beta=0.03$ )             | 112  | PRKDC   | 7.7%    |              |                                                                           |
| 13   | FAT4   | 20.3%   |                 | ReMIC( $\beta=0.01$ );<br>ReMIC( $\beta=0.02$ );<br>ReMIC( $\beta=0.03$ )             | 113  | TAF1L   | 9.2%    |              |                                                                           |

|    |         |       |                 |                                                                                                          |     |        |       |                 |                                                                                                          |
|----|---------|-------|-----------------|----------------------------------------------------------------------------------------------------------|-----|--------|-------|-----------------|----------------------------------------------------------------------------------------------------------|
| 14 | CUBN    | 14.5% |                 | HotNet2;<br>ReMIC( $\beta=0.01$ );<br>ReMIC( $\beta=0.02$ );<br>ReMIC( $\beta=0.03$ )                    | 114 | ACVR2A | 9.7%  |                 | HotNet2;<br>ReMIC( $\beta=0.01$ );<br>ReMIC( $\beta=0.02$ );<br>ReMIC( $\beta=0.03$ );<br>MUFFINN(DNmax) |
| 15 | DNAH5   | 18.4% |                 | ReMIC( $\beta=0.01$ );<br>ReMIC( $\beta=0.02$ );<br>ReMIC( $\beta=0.03$ )                                | 115 | ABCA1  | 7.2%  |                 | ReMIC( $\beta=0.01$ );<br>ReMIC( $\beta=0.02$ );<br>ReMIC( $\beta=0.03$ );<br>MUFFINN(DNmax)             |
| 16 | ANK2    | 14.0% |                 | HotNet2;<br>ReMIC( $\beta=0.01$ );<br>ReMIC( $\beta=0.02$ );<br>ReMIC( $\beta=0.03$ )                    | 116 | GRIA1  | 8.2%  |                 | ReMIC( $\beta=0.01$ )                                                                                    |
| 17 | CSMD1   | 15.0% |                 | ReMIC( $\beta=0.01$ );<br>ReMIC( $\beta=0.02$ );<br>ReMIC( $\beta=0.03$ )                                | 117 | DNMT1  | 8.2%  |                 | ReMIC( $\beta=0.01$ );<br>ReMIC( $\beta=0.02$ );<br>ReMIC( $\beta=0.03$ )                                |
| 18 | RYR1    | 13.0% |                 |                                                                                                          | 118 | SCN1A  | 9.7%  |                 |                                                                                                          |
| 19 | USH2A   | 16.9% |                 |                                                                                                          | 119 | BAI3   | 9.7%  |                 | ReMIC( $\beta=0.01$ );<br>ReMIC( $\beta=0.02$ );<br>ReMIC( $\beta=0.03$ )                                |
| 20 | LAMA1   | 13.5% |                 | HotNet2;<br>MUFFINN(DNsum)                                                                               | 120 | C3     | 6.8%  |                 | ReMIC( $\beta=0.01$ );<br>ReMIC( $\beta=0.02$ );<br>ReMIC( $\beta=0.03$ )                                |
| 21 | SMAD4   | 11.6% | CGC;<br>IntOGen |                                                                                                          | 121 | ABCA12 | 11.1% |                 | ReMIC( $\beta=0.01$ );<br>ReMIC( $\beta=0.02$ );<br>ReMIC( $\beta=0.03$ )                                |
| 22 | GRIN2A  | 12.6% | Novel           | HotNet2                                                                                                  | 122 | REV3L  | 8.7%  |                 |                                                                                                          |
| 23 | RYR2    | 12.6% |                 |                                                                                                          | 123 | SPTB   | 8.7%  |                 |                                                                                                          |
| 24 | TCF7L2  | 14.0% | CGC;<br>IntOGen |                                                                                                          | 124 | HUWE1  | 8.2%  |                 |                                                                                                          |
| 25 | RELN    | 12.6% |                 |                                                                                                          | 125 | SMAD2  | 6.8%  | CGC;<br>IntOGen |                                                                                                          |
| 26 | VCAN    | 11.6% |                 |                                                                                                          | 126 | SRCAP  | 8.2%  |                 |                                                                                                          |
| 27 | MACF1   | 12.1% |                 |                                                                                                          | 127 | PTPRM  | 9.7%  |                 |                                                                                                          |
| 28 | NEB     | 10.6% |                 |                                                                                                          | 128 | NFASC  | 8.2%  |                 |                                                                                                          |
| 29 | APOB    | 11.6% |                 | ReMIC( $\beta=0.01$ );<br>ReMIC( $\beta=0.02$ );<br>ReMIC( $\beta=0.03$ )                                | 129 | EDNRB  | 7.7%  |                 | ReMIC( $\beta=0.01$ );<br>ReMIC( $\beta=0.02$ );<br>ReMIC( $\beta=0.03$ )                                |
| 30 | COL6A3  | 15.5% |                 | ReMIC( $\beta=0.01$ );<br>ReMIC( $\beta=0.02$ );<br>ReMIC( $\beta=0.03$ )                                | 130 | CAD    | 7.2%  | IntOGen         | ReMIC( $\beta=0.01$ );<br>ReMIC( $\beta=0.02$ );<br>ReMIC( $\beta=0.03$ )                                |
| 31 | ATM     | 10.6% | IntOGen         | ReMIC( $\beta=0.01$ );<br>ReMIC( $\beta=0.02$ );<br>ReMIC( $\beta=0.03$ )                                | 131 | MYO9A  | 8.2%  |                 |                                                                                                          |
| 32 | CSMD2   | 14.5% |                 | ReMIC( $\beta=0.01$ );<br>ReMIC( $\beta=0.02$ );<br>ReMIC( $\beta=0.03$ )                                | 132 | RP1    | 7.7%  |                 |                                                                                                          |
| 33 | ROBO1   | 11.1% |                 |                                                                                                          | 133 | CACHD1 | 7.7%  |                 | ReMIC( $\beta=0.01$ );<br>ReMIC( $\beta=0.02$ );<br>ReMIC( $\beta=0.03$ )                                |
| 34 | ERBB4   | 10.6% |                 | ReMIC( $\beta=0.01$ );<br>ReMIC( $\beta=0.02$ );<br>ReMIC( $\beta=0.03$ )                                | 134 | CDH2   | 7.2%  |                 | ReMIC( $\beta=0.01$ );<br>ReMIC( $\beta=0.02$ );<br>ReMIC( $\beta=0.03$ )                                |
| 35 | FN1     | 9.7%  | IntOGen         | ReMIC( $\beta=0.01$ );<br>ReMIC( $\beta=0.02$ )                                                          | 135 | CDH10  | 8.2%  |                 | HotNet2;<br>ReMIC( $\beta=0.01$ );<br>ReMIC( $\beta=0.02$ );<br>ReMIC( $\beta=0.03$ )                    |
| 36 | DOCK2   | 11.1% |                 | HotNet2;<br>ReMIC( $\beta=0.01$ );<br>ReMIC( $\beta=0.02$ );<br>ReMIC( $\beta=0.03$ )                    | 136 | LAMA3  | 7.2%  |                 | HotNet2                                                                                                  |
| 37 | MYH11   | 11.1% |                 |                                                                                                          | 137 | NOTCH2 | 7.2%  |                 |                                                                                                          |
| 38 | ANK1    | 10.6% |                 | HotNet2;<br>ReMIC( $\beta=0.01$ );<br>ReMIC( $\beta=0.02$ );<br>ReMIC( $\beta=0.03$ );<br>MUFFINN(DNmax) | 138 | SRRM2  | 6.8%  |                 |                                                                                                          |
| 39 | PKHD1   | 12.1% |                 |                                                                                                          | 139 | ZFH3   | 9.2%  |                 |                                                                                                          |
| 40 | ARID1A  | 11.1% | IntOGen         | ReMIC( $\beta=0.01$ );<br>ReMIC( $\beta=0.02$ );<br>ReMIC( $\beta=0.03$ )                                | 140 | POLE   | 7.2%  | Novel           |                                                                                                          |
| 41 | TNC     | 11.1% |                 |                                                                                                          | 141 | COL4A5 | 7.7%  |                 | HotNet2;<br>ReMIC( $\beta=0.01$ );<br>ReMIC( $\beta=0.02$ );<br>ReMIC( $\beta=0.03$ )                    |
| 42 | COL5A1  | 10.6% |                 | HotNet2;<br>ReMIC( $\beta=0.01$ );<br>ReMIC( $\beta=0.02$ );<br>ReMIC( $\beta=0.03$ )                    | 142 | CHD6   | 8.2%  |                 | ReMIC( $\beta=0.01$ );<br>ReMIC( $\beta=0.02$ );<br>ReMIC( $\beta=0.03$ )                                |
| 43 | AKAP9   | 9.7%  | IntOGen         | ReMIC( $\beta=0.01$ );<br>ReMIC( $\beta=0.02$ );<br>ReMIC( $\beta=0.03$ );<br>MUFFINN(DNmax)             | 143 | CDH18  | 7.7%  |                 | HotNet2;<br>ReMIC( $\beta=0.01$ );<br>ReMIC( $\beta=0.02$ );<br>ReMIC( $\beta=0.03$ )                    |
| 44 | MAP1B   | 10.6% |                 |                                                                                                          | 144 | CDH12  | 7.2%  |                 | HotNet2;<br>ReMIC( $\beta=0.01$ );<br>ReMIC( $\beta=0.02$ );<br>ReMIC( $\beta=0.03$ )                    |
| 45 | LRP1    | 9.2%  |                 |                                                                                                          | 145 | MCC    | 6.3%  |                 |                                                                                                          |
| 46 | NRXN1   | 10.6% |                 |                                                                                                          | 146 | DNAH3  | 10.6% |                 | ReMIC( $\beta=0.01$ );<br>ReMIC( $\beta=0.02$ );<br>ReMIC( $\beta=0.03$ )                                |
| 47 | CREBBP  | 9.2%  | IntOGen         | ReMIC( $\beta=0.01$ );<br>ReMIC( $\beta=0.02$ );<br>ReMIC( $\beta=0.03$ )                                | 147 | MAP3K4 | 7.7%  | IntOGen         |                                                                                                          |
| 48 | SDK1    | 14.5% |                 |                                                                                                          | 148 | SCN5A  | 7.7%  |                 |                                                                                                          |
| 49 | RYR3    | 11.6% |                 |                                                                                                          | 149 | SORCS1 | 8.7%  |                 |                                                                                                          |
| 50 | LIFR    | 10.6% |                 |                                                                                                          | 150 | STAB2  | 7.7%  |                 |                                                                                                          |
| 51 | SACS    | 12.1% |                 |                                                                                                          | 151 | HERC2  | 7.7%  |                 |                                                                                                          |
| 52 | FBN1    | 9.7%  |                 | ReMIC( $\beta=0.01$ );<br>ReMIC( $\beta=0.02$ );<br>ReMIC( $\beta=0.03$ )                                | 152 | PCDHB5 | 7.2%  |                 |                                                                                                          |
| 53 | MDN1    | 11.6% |                 |                                                                                                          | 153 | TNS1   | 8.7%  |                 |                                                                                                          |
| 54 | DYNC1H1 | 9.7%  |                 | ReMIC( $\beta=0.01$ );<br>ReMIC( $\beta=0.02$ );<br>ReMIC( $\beta=0.03$ )                                | 154 | ATP2B2 | 8.2%  |                 | ReMIC( $\beta=0.01$ );<br>ReMIC( $\beta=0.02$ );<br>ReMIC( $\beta=0.03$ )                                |
| 55 | DAPK1   | 9.2%  |                 | ReMIC( $\beta=0.01$ );<br>ReMIC( $\beta=0.02$ );<br>ReMIC( $\beta=0.03$ )                                | 155 | SCN2A  | 7.7%  |                 |                                                                                                          |
| 56 | MAP2    | 10.6% |                 |                                                                                                          | 156 | DMXL2  | 7.7%  |                 | HotNet2;<br>ReMIC( $\beta=0.01$ );<br>ReMIC( $\beta=0.02$ );<br>ReMIC( $\beta=0.03$ )                    |

|    |         |       |                 |                                                                                                                 |     |         |      |         |                                                                                       |
|----|---------|-------|-----------------|-----------------------------------------------------------------------------------------------------------------|-----|---------|------|---------|---------------------------------------------------------------------------------------|
| 57 | CHD4    | 9.2%  | IntOGen         | ReMIC( $\beta=0.01$ );<br>ReMIC( $\beta=0.02$ );<br>ReMIC( $\beta=0.03$ )                                       | 157 | BSN     | 7.2% |         | HotNet2;<br>ReMIC( $\beta=0.01$ );<br>ReMIC( $\beta=0.02$ );<br>ReMIC( $\beta=0.03$ ) |
| 58 | ATR     | 8.7%  |                 | ReMIC( $\beta=0.01$ );<br>ReMIC( $\beta=0.02$ );<br>ReMIC( $\beta=0.03$ )                                       | 158 | RIMS2   | 7.7% |         | MUFFINN(DNsum)                                                                        |
| 59 | EPHA5   | 9.7%  |                 | ReMIC( $\beta=0.01$ );<br>ReMIC( $\beta=0.02$ );<br>ReMIC( $\beta=0.03$ )                                       | 159 | TRIP12  | 7.7% |         |                                                                                       |
| 60 | PLXNA4  | 11.6% |                 |                                                                                                                 | 160 | FLT1    | 7.2% |         | ReMIC( $\beta=0.01$ );<br>ReMIC( $\beta=0.02$ )                                       |
| 61 | COL1A2  | 9.2%  |                 | ReMIC( $\beta=0.01$ );<br>ReMIC( $\beta=0.02$ );<br>ReMIC( $\beta=0.03$ )                                       | 161 | NAV2    | 7.7% |         |                                                                                       |
| 62 | AFF2    | 11.6% |                 | ReMIC( $\beta=0.01$ );<br>ReMIC( $\beta=0.02$ );<br>ReMIC( $\beta=0.03$ );<br>MUFFINN(DNmax)                    | 162 | OBSCN   | 8.2% |         |                                                                                       |
| 63 | ADCY2   | 9.7%  |                 | ReMIC( $\beta=0.01$ );<br>ReMIC( $\beta=0.02$ );<br>ReMIC( $\beta=0.03$ );<br>MUFFINN(DNmax);<br>MUFFINN(DNsum) | 163 | PTPRT   | 8.7% |         |                                                                                       |
| 64 | EP300   | 7.2%  | CGC             | ReMIC( $\beta=0.01$ );<br>ReMIC( $\beta=0.02$ );<br>ReMIC( $\beta=0.03$ )                                       | 164 | UNC79   | 8.7% |         |                                                                                       |
| 65 | DST     | 8.7%  |                 | ReMIC( $\beta=0.01$ );<br>ReMIC( $\beta=0.02$ );<br>ReMIC( $\beta=0.03$ )                                       | 165 | RIF1    | 6.3% |         |                                                                                       |
| 66 | NRXN3   | 10.1% |                 |                                                                                                                 | 166 | ASPM    | 9.2% | IntOGen | ReMIC( $\beta=0.01$ );<br>ReMIC( $\beta=0.02$ );<br>ReMIC( $\beta=0.03$ )             |
| 67 | EPHA3   | 10.1% |                 | ReMIC( $\beta=0.01$ );<br>ReMIC( $\beta=0.02$ );<br>ReMIC( $\beta=0.03$ );<br>MUFFINN(DNsum)                    | 167 | MAGEC1  | 6.8% |         | HotNet2                                                                               |
| 68 | UTRN    | 8.7%  |                 | MUFFINN(DNsum)                                                                                                  | 168 | DSCAML1 | 7.7% |         | HotNet2;<br>ReMIC( $\beta=0.01$ );<br>ReMIC( $\beta=0.02$ );<br>ReMIC( $\beta=0.03$ ) |
| 69 | FBN2    | 9.7%  |                 | ReMIC( $\beta=0.01$ );<br>ReMIC( $\beta=0.02$ );<br>ReMIC( $\beta=0.03$ )                                       | 169 | NIPBL   | 7.7% |         |                                                                                       |
| 70 | BRAF    | 9.7%  | CGC;<br>IntOGen | ReMIC( $\beta=0.01$ );<br>ReMIC( $\beta=0.02$ );<br>ReMIC( $\beta=0.03$ )                                       | 170 | GOLGB1  | 6.8% |         | ReMIC( $\beta=0.01$ )                                                                 |
| 71 | TRPC4   | 9.2%  |                 |                                                                                                                 | 171 | DLC1    | 8.2% |         | ReMIC( $\beta=0.01$ );<br>ReMIC( $\beta=0.02$ );<br>ReMIC( $\beta=0.03$ )             |
| 72 | ZC3H13  | 9.7%  |                 |                                                                                                                 | 172 | MYO3A   | 7.7% |         |                                                                                       |
| 73 | LYST    | 8.7%  |                 |                                                                                                                 | 173 | PDZRN4  | 7.2% |         |                                                                                       |
| 74 | PDZD2   | 9.7%  |                 |                                                                                                                 | 174 | ITPR3   | 8.2% |         | HotNet2                                                                               |
| 75 | DYSF    | 9.2%  |                 | HotNet2;<br>ReMIC( $\beta=0.01$ );<br>ReMIC( $\beta=0.02$ );<br>ReMIC( $\beta=0.03$ )                           | 175 | VPS13D  | 7.7% |         |                                                                                       |
| 76 | ALK     | 8.2%  |                 | ReMIC( $\beta=0.01$ );<br>ReMIC( $\beta=0.02$ );<br>ReMIC( $\beta=0.03$ );<br>MUFFINN(DNmax)                    | 176 | PREX1   | 7.7% |         |                                                                                       |
| 77 | ACACA   | 8.2%  |                 | ReMIC( $\beta=0.01$ );<br>ReMIC( $\beta=0.02$ )                                                                 | 177 | LRRK2   | 8.7% |         |                                                                                       |
| 78 | LAMA2   | 10.1% |                 | HotNet2                                                                                                         | 178 | HDAC9   | 6.8% |         |                                                                                       |
| 79 | TG      | 9.7%  |                 |                                                                                                                 | 179 | COL1A1  | 7.2% |         | ReMIC( $\beta=0.01$ );<br>ReMIC( $\beta=0.02$ );<br>ReMIC( $\beta=0.03$ )             |
| 80 | CDC27   | 8.2%  |                 | ReMIC( $\beta=0.01$ );<br>ReMIC( $\beta=0.02$ );<br>ReMIC( $\beta=0.03$ )                                       | 180 | SPEN    | 7.2% |         |                                                                                       |
| 81 | WDFY3   | 10.1% |                 |                                                                                                                 | 181 | NAV3    | 7.2% |         |                                                                                       |
| 82 | ANK3    | 8.7%  |                 | ReMIC( $\beta=0.01$ );<br>ReMIC( $\beta=0.02$ );<br>ReMIC( $\beta=0.03$ )                                       | 182 | MASP1   | 7.2% |         | HotNet2                                                                               |
| 83 | KALRN   | 9.2%  |                 |                                                                                                                 | 183 | PCDH17  | 9.7% |         |                                                                                       |
| 84 | DCC     | 8.2%  |                 | ReMIC( $\beta=0.01$ );<br>ReMIC( $\beta=0.02$ );<br>ReMIC( $\beta=0.03$ )                                       | 184 | F5      | 6.3% |         | HotNet2;<br>ReMIC( $\beta=0.01$ );<br>ReMIC( $\beta=0.02$ );<br>ReMIC( $\beta=0.03$ ) |
| 85 | TGFBR2  | 9.2%  | CGC;<br>IntOGen |                                                                                                                 | 185 | ARID2   | 7.2% |         | ReMIC( $\beta=0.01$ );<br>ReMIC( $\beta=0.02$ );<br>ReMIC( $\beta=0.03$ )             |
| 86 | MTOR    | 8.7%  |                 | MUFFINN(DNsum)                                                                                                  | 186 | TSHZ3   | 9.2% |         |                                                                                       |
| 87 | KCNQ3   | 8.2%  |                 | HotNet2                                                                                                         | 187 | CNTN1   | 7.2% |         | ReMIC( $\beta=0.01$ );<br>ReMIC( $\beta=0.02$ );<br>ReMIC( $\beta=0.03$ )             |
| 88 | NID1    | 8.2%  |                 |                                                                                                                 | 188 | NCKAP5  | 7.2% |         |                                                                                       |
| 89 | NLRP4   | 8.7%  |                 |                                                                                                                 | 189 | CENPF   | 8.2% |         | ReMIC( $\beta=0.01$ );<br>ReMIC( $\beta=0.02$ );<br>ReMIC( $\beta=0.03$ )             |
| 90 | CTNND2  | 9.2%  |                 | HotNet2;<br>ReMIC( $\beta=0.01$ );<br>ReMIC( $\beta=0.02$ );<br>ReMIC( $\beta=0.03$ )                           | 190 | THBS2   | 8.2% |         |                                                                                       |
| 91 | NRAS    | 9.2%  | IntOGen         |                                                                                                                 | 191 | MED12   | 6.8% |         | MUFFINN(DNsum)                                                                        |
| 92 | MYO16   | 10.1% |                 |                                                                                                                 | 192 | GUCY1A3 | 7.2% |         |                                                                                       |
| 93 | GRIK3   | 9.2%  |                 | ReMIC( $\beta=0.01$ )                                                                                           | 193 | BRCA2   | 6.3% |         | ReMIC( $\beta=0.01$ );<br>ReMIC( $\beta=0.02$ );<br>ReMIC( $\beta=0.03$ )             |
| 94 | FCGBP   | 10.6% |                 | ReMIC( $\beta=0.01$ );<br>ReMIC( $\beta=0.02$ )                                                                 | 194 | PIK3CG  | 6.8% |         |                                                                                       |
| 95 | MKI67   | 9.2%  |                 |                                                                                                                 | 195 | ITPR1   | 6.3% |         |                                                                                       |
| 96 | TIAM1   | 8.2%  |                 |                                                                                                                 | 196 | EGFR    | 5.8% | IntOGen | ReMIC( $\beta=0.01$ );<br>ReMIC( $\beta=0.02$ );<br>ReMIC( $\beta=0.03$ )             |
| 97 | COL11A1 | 8.7%  |                 | HotNet2;<br>ReMIC( $\beta=0.01$ );<br>ReMIC( $\beta=0.02$ );<br>ReMIC( $\beta=0.03$ )                           | 197 | SETD2   | 7.2% |         |                                                                                       |
| 98 | GLI3    | 7.7%  |                 | ReMIC( $\beta=0.01$ );<br>HotNet2;                                                                              | 198 | USP44   | 6.3% |         |                                                                                       |
| 99 | CDH9    | 8.2%  |                 | ReMIC( $\beta=0.01$ );<br>ReMIC( $\beta=0.02$ );<br>ReMIC( $\beta=0.03$ )                                       | 199 | SEC63   | 7.7% |         |                                                                                       |



|     |         |       |  |                                                                                       |     |       |      |  |  |
|-----|---------|-------|--|---------------------------------------------------------------------------------------|-----|-------|------|--|--|
| 100 | CACNA1E | 10.1% |  | HotNet2;<br>ReMIC( $\beta=0.01$ );<br>ReMIC( $\beta=0.02$ );<br>ReMIC( $\beta=0.03$ ) | 200 | PI4KA | 7.2% |  |  |
|-----|---------|-------|--|---------------------------------------------------------------------------------------|-----|-------|------|--|--|

**Table S5.** The full list of the top 200 genes detected by our model on BRCA dataset. The table demonstrates the ranks of the genes, gene symbols, mutation rates, the included benchmarking gene lists [1, 2] of the genes and the other methods [5, 6, 7] by which the genes are also detected.

| Rank | Symbol | MutRate | Benchmarking    | OtherMethod                                                                                  | Rank | Symbol  | MutRate | Benchmarking | OtherMethod                                                                                                                                             |
|------|--------|---------|-----------------|----------------------------------------------------------------------------------------------|------|---------|---------|--------------|---------------------------------------------------------------------------------------------------------------------------------------------------------|
| 1    | TP53   | 37.6%   | CGC;<br>IntOGen |                                                                                              | 101  | WDFY3   | 2.6%    |              |                                                                                                                                                         |
| 2    | PIK3CA | 35.2%   | CGC;<br>IntOGen | ReMIC( $\beta=0.01$ );<br>ReMIC( $\beta=0.02$ )                                              | 102  | MAP1A   | 2.0%    |              | ReMIC( $\beta=0.01$ );<br>ReMIC( $\beta=0.02$ );<br>ReMIC( $\beta=0.03$ );<br>ReMIC( $\beta=0.01$ );<br>ReMIC( $\beta=0.02$ );<br>ReMIC( $\beta=0.03$ ) |
| 3    | TTN    | 17.1%   |                 |                                                                                              | 103  | CBLB    | 2.0%    |              |                                                                                                                                                         |
| 4    | MUC16  | 10.9%   |                 | HotNet2;<br>ReMIC( $\beta=0.01$ );<br>ReMIC( $\beta=0.02$ );<br>ReMIC( $\beta=0.03$ )        | 104  | SRCAP   | 2.4%    |              |                                                                                                                                                         |
| 5    | GATA3  | 10.9%   | CGC;<br>IntOGen | HotNet2;<br>ReMIC( $\beta=0.01$ );<br>ReMIC( $\beta=0.02$ );<br>ReMIC( $\beta=0.03$ )        | 105  | SMARCA4 | 1.6%    | IntOGen      |                                                                                                                                                         |
| 6    | MAP3K1 | 8.0%    | CGC;<br>IntOGen | ReMIC( $\beta=0.01$ );<br>ReMIC( $\beta=0.02$ );<br>ReMIC( $\beta=0.03$ )                    | 106  | CACNA1H | 2.2%    |              | ReMIC( $\beta=0.01$ );<br>ReMIC( $\beta=0.02$ );<br>ReMIC( $\beta=0.03$ );<br>ReMIC( $\beta=0.01$ );<br>ReMIC( $\beta=0.02$ );<br>ReMIC( $\beta=0.03$ ) |
| 7    | RYR2   | 6.6%    |                 | ReMIC( $\beta=0.01$ )                                                                        | 107  | CSPG4   | 2.2%    |              | ReMIC( $\beta=0.01$ );<br>ReMIC( $\beta=0.02$ );<br>ReMIC( $\beta=0.03$ )                                                                               |
| 8    | CDH1   | 6.8%    | CGC;<br>IntOGen | ReMIC( $\beta=0.01$ );<br>ReMIC( $\beta=0.02$ );<br>ReMIC( $\beta=0.03$ )                    | 108  | SCN2A   | 2.0%    |              | ReMIC( $\beta=0.01$ )                                                                                                                                   |
| 9    | OBSCN  | 6.0%    |                 | HotNet2;<br>ReMIC( $\beta=0.01$ );<br>ReMIC( $\beta=0.02$ )                                  | 109  | HRNR    | 2.2%    |              | ReMIC( $\beta=0.01$ );<br>ReMIC( $\beta=0.02$ );<br>ReMIC( $\beta=0.03$ )                                                                               |
| 10   | MUC4   | 5.2%    |                 | HotNet2;<br>ReMIC( $\beta=0.01$ );<br>ReMIC( $\beta=0.02$ );<br>ReMIC( $\beta=0.03$ )        | 110  | CSMD2   | 2.4%    |              | ReMIC( $\beta=0.01$ );<br>ReMIC( $\beta=0.02$ );<br>ReMIC( $\beta=0.03$ )                                                                               |
| 11   | USH2A  | 6.4%    |                 |                                                                                              | 111  | HERC2   | 2.0%    |              | ReMIC( $\beta=0.01$ );<br>ReMIC( $\beta=0.02$ );<br>ReMIC( $\beta=0.03$ )                                                                               |
| 12   | CSMD1  | 5.6%    |                 | ReMIC( $\beta=0.01$ );<br>ReMIC( $\beta=0.02$ );<br>ReMIC( $\beta=0.03$ )                    | 112  | SDK1    | 2.6%    |              | ReMIC( $\beta=0.01$ )                                                                                                                                   |
| 13   | FLG    | 5.6%    |                 | ReMIC( $\beta=0.01$ );<br>ReMIC( $\beta=0.02$ );<br>ReMIC( $\beta=0.03$ )                    | 113  | TBL1XR1 | 2.0%    | IntOGen      |                                                                                                                                                         |
| 14   | BRCA2  | 4.8%    | CGC;<br>IntOGen | ReMIC( $\beta=0.01$ );<br>ReMIC( $\beta=0.02$ );<br>ReMIC( $\beta=0.03$ )                    | 114  | MGAM    | 2.4%    |              | ReMIC( $\beta=0.01$ );<br>ReMIC( $\beta=0.02$ );<br>ReMIC( $\beta=0.03$ )                                                                               |
| 15   | BRCA1  | 3.8%    | IntOGen         | ReMIC( $\beta=0.01$ );<br>ReMIC( $\beta=0.02$ );<br>ReMIC( $\beta=0.03$ )                    | 115  | NOTCH2  | 1.8%    | IntOGen      | ReMIC( $\beta=0.01$ )                                                                                                                                   |
| 16   | LRP2   | 4.0%    |                 | ReMIC( $\beta=0.01$ );<br>ReMIC( $\beta=0.02$ );<br>ReMIC( $\beta=0.03$ );<br>MUFFINN(DNsum) | 116  | DNAH1   | 2.4%    |              | ReMIC( $\beta=0.01$ );<br>ReMIC( $\beta=0.02$ );<br>ReMIC( $\beta=0.03$ )                                                                               |
| 17   | ATM    | 4.0%    | IntOGen         | ReMIC( $\beta=0.01$ );<br>ReMIC( $\beta=0.02$ );<br>ReMIC( $\beta=0.03$ )                    | 117  | MYH7    | 2.2%    |              | ReMIC( $\beta=0.01$ );<br>ReMIC( $\beta=0.02$ );<br>ReMIC( $\beta=0.03$ )                                                                               |
| 18   | NCOR1  | 3.6%    | CGC;<br>IntOGen | ReMIC( $\beta=0.01$ );<br>ReMIC( $\beta=0.02$ )                                              | 118  | CBFB    | 1.8%    | IntOGen      | ReMIC( $\beta=0.02$ );<br>ReMIC( $\beta=0.03$ )                                                                                                         |
| 19   | SYNE1  | 4.4%    |                 |                                                                                              | 119  | RPGR    | 2.0%    | IntOGen      | ReMIC( $\beta=0.01$ )                                                                                                                                   |
| 20   | PIK3R1 | 3.0%    | IntOGen         | ReMIC( $\beta=0.01$ );<br>ReMIC( $\beta=0.02$ )                                              | 120  | PDE3A   | 2.2%    |              | ReMIC( $\beta=0.01$ );<br>ReMIC( $\beta=0.02$ )                                                                                                         |
| 21   | RYR3   | 4.8%    |                 | ReMIC( $\beta=0.01$ )                                                                        | 121  | LAMA2   | 2.0%    |              | HotNet2;<br>ReMIC( $\beta=0.01$ );<br>ReMIC( $\beta=0.02$ );<br>ReMIC( $\beta=0.03$ )                                                                   |
| 22   | SPEN   | 3.8%    |                 |                                                                                              | 122  | PREX2   | 2.6%    |              | ReMIC( $\beta=0.01$ );<br>ReMIC( $\beta=0.02$ )                                                                                                         |
| 23   | SSPO   | 3.8%    |                 |                                                                                              | 123  | EVPL    | 1.8%    |              | HotNet2;<br>ReMIC( $\beta=0.01$ );<br>ReMIC( $\beta=0.02$ );<br>ReMIC( $\beta=0.03$ );<br>MUFFINN(DNsum)                                                |
| 24   | MAP2K4 | 4.2%    | CGC;<br>IntOGen | ReMIC( $\beta=0.01$ );<br>ReMIC( $\beta=0.02$ );<br>ReMIC( $\beta=0.03$ )                    | 124  | TEP1    | 2.0%    |              |                                                                                                                                                         |
| 25   | RYR1   | 3.4%    |                 | ReMIC( $\beta=0.01$ )                                                                        | 125  | IARS    | 1.6%    |              | ReMIC( $\beta=0.01$ )                                                                                                                                   |
| 26   | NEB    | 3.8%    |                 | HotNet2;<br>ReMIC( $\beta=0.01$ );<br>ReMIC( $\beta=0.02$ )                                  | 126  | MUC12   | 2.2%    |              | ReMIC( $\beta=0.01$ );<br>ReMIC( $\beta=0.02$ );<br>ReMIC( $\beta=0.03$ )                                                                               |
| 27   | APOB   | 3.8%    |                 | HotNet2;<br>ReMIC( $\beta=0.01$ );<br>ReMIC( $\beta=0.02$ );<br>ReMIC( $\beta=0.03$ )        | 127  | VCAN    | 1.8%    |              |                                                                                                                                                         |
| 28   | RUNX1  | 3.8%    | IntOGen         | ReMIC( $\beta=0.01$ )                                                                        | 128  | ABCB1   | 1.8%    |              | ReMIC( $\beta=0.01$ );<br>ReMIC( $\beta=0.02$ );<br>ReMIC( $\beta=0.03$ );<br>MUFFINN(DNmax)                                                            |
| 29   | PTEN   | 3.6%    | IntOGen         | ReMIC( $\beta=0.01$ )                                                                        | 129  | MED23   | 1.8%    |              | ReMIC( $\beta=0.01$ );<br>ReMIC( $\beta=0.02$ );<br>ReMIC( $\beta=0.03$ )                                                                               |
| 30   | SPI1   | 3.2%    |                 |                                                                                              | 130  | MAST1   | 1.8%    |              | ReMIC( $\beta=0.01$ );<br>ReMIC( $\beta=0.03$ )                                                                                                         |
| 31   | SYNE2  | 3.8%    |                 |                                                                                              | 131  | HUWE1   | 1.8%    |              | ReMIC( $\beta=0.02$ );<br>ReMIC( $\beta=0.03$ )                                                                                                         |
| 32   | SPTA1  | 3.6%    |                 |                                                                                              | 132  | HTT     | 1.6%    |              | ReMIC( $\beta=0.01$ );<br>ReMIC( $\beta=0.02$ );<br>ReMIC( $\beta=0.03$ )                                                                               |

|    |         |      |                 |                                                                                              |     |         |      |                 |                                                                                       |
|----|---------|------|-----------------|----------------------------------------------------------------------------------------------|-----|---------|------|-----------------|---------------------------------------------------------------------------------------|
| 33 | UBR4    | 3.6% |                 |                                                                                              | 133 | MYH14   | 2.0% | IntOGen         | HotNet2;<br>ReMIC( $\beta=0.01$ );<br>ReMIC( $\beta=0.02$ );<br>ReMIC( $\beta=0.03$ ) |
| 34 | MTOR    | 2.6% | IntOGen         | ReMIC( $\beta=0.01$ );<br>ReMIC( $\beta=0.02$ );<br>ReMIC( $\beta=0.03$ )                    | 134 | SVIL    | 1.6% |                 |                                                                                       |
| 35 | DMD     | 3.2% |                 | HotNet2;<br>ReMIC( $\beta=0.01$ );<br>ReMIC( $\beta=0.02$ );<br>ReMIC( $\beta=0.03$ )        | 135 | PTPRB   | 1.8% |                 | ReMIC( $\beta=0.01$ )                                                                 |
| 36 | AKT1    | 2.6% | CGC;<br>IntOGen | ReMIC( $\beta=0.01$ );<br>ReMIC( $\beta=0.02$ );<br>ReMIC( $\beta=0.03$ )                    | 136 | GRIN2A  | 2.0% |                 | ReMIC( $\beta=0.01$ );<br>ReMIC( $\beta=0.02$ );<br>ReMIC( $\beta=0.03$ )             |
| 37 | FBN1    | 2.6% |                 | ReMIC( $\beta=0.01$ );<br>ReMIC( $\beta=0.02$ );<br>ReMIC( $\beta=0.03$ )                    | 137 | COL14A1 | 2.2% |                 | ReMIC( $\beta=0.01$ );<br>ReMIC( $\beta=0.02$ );<br>ReMIC( $\beta=0.03$ )             |
| 38 | ANK1    | 2.8% |                 | HotNet2;<br>ReMIC( $\beta=0.01$ );<br>ReMIC( $\beta=0.02$ );<br>ReMIC( $\beta=0.03$ )        | 138 | ASPM    | 2.0% | IntOGen         | ReMIC( $\beta=0.01$ );<br>ReMIC( $\beta=0.02$ );<br>ReMIC( $\beta=0.03$ )             |
| 39 | TG      | 3.0% |                 |                                                                                              | 139 | FANCA   | 1.6% |                 | ReMIC( $\beta=0.02$ );<br>ReMIC( $\beta=0.03$ )                                       |
| 40 | VWF     | 2.6% |                 |                                                                                              | 140 | KIF4A   | 1.8% |                 | HotNet2;<br>ReMIC( $\beta=0.01$ );<br>ReMIC( $\beta=0.02$ );<br>ReMIC( $\beta=0.03$ ) |
| 41 | RELN    | 3.4% |                 | ReMIC( $\beta=0.01$ );<br>ReMIC( $\beta=0.01$ );                                             | 141 | TPR     | 1.8% |                 |                                                                                       |
| 42 | FLNC    | 2.8% |                 | ReMIC( $\beta=0.02$ );<br>ReMIC( $\beta=0.03$ )                                              | 142 | MYH6    | 1.8% |                 | HotNet2;<br>ReMIC( $\beta=0.01$ );<br>ReMIC( $\beta=0.03$ )                           |
| 43 | MUC2    | 3.6% |                 | ReMIC( $\beta=0.01$ );<br>ReMIC( $\beta=0.02$ );<br>ReMIC( $\beta=0.03$ )                    | 143 | GRM3    | 1.8% |                 | ReMIC( $\beta=0.01$ );<br>ReMIC( $\beta=0.03$ )                                       |
| 44 | LAMA5   | 2.6% |                 | ReMIC( $\beta=0.01$ );<br>ReMIC( $\beta=0.02$ );<br>ReMIC( $\beta=0.03$ )                    | 144 | PIWIL1  | 1.8% |                 | ReMIC( $\beta=0.01$ );<br>ReMIC( $\beta=0.02$ )                                       |
| 45 | PLEC    | 3.0% |                 | ReMIC( $\beta=0.01$ );<br>ReMIC( $\beta=0.02$ )                                              | 145 | PREX1   | 1.8% |                 | ReMIC( $\beta=0.02$ )                                                                 |
| 46 | CTCF    | 3.0% | CGC;<br>IntOGen | ReMIC( $\beta=0.01$ );<br>ReMIC( $\beta=0.02$ );<br>ReMIC( $\beta=0.03$ )                    | 146 | TAF1    | 1.6% | IntOGen         |                                                                                       |
| 47 | LRP1    | 2.4% |                 | ReMIC( $\beta=0.01$ );<br>ReMIC( $\beta=0.02$ );<br>ReMIC( $\beta=0.03$ )                    | 147 | COL12A1 | 2.2% |                 | ReMIC( $\beta=0.01$ );<br>ReMIC( $\beta=0.02$ );<br>ReMIC( $\beta=0.03$ )             |
| 48 | MDN1    | 3.0% |                 | ReMIC( $\beta=0.01$ );<br>ReMIC( $\beta=0.02$ );<br>ReMIC( $\beta=0.03$ )                    | 148 | MADD    | 2.0% |                 | HotNet2;<br>ReMIC( $\beta=0.01$ );<br>ReMIC( $\beta=0.02$ );<br>ReMIC( $\beta=0.03$ ) |
| 49 | MLLT4   | 2.4% | IntOGen         | ReMIC( $\beta=0.01$ );<br>ReMIC( $\beta=0.02$ );<br>ReMIC( $\beta=0.03$ )                    | 149 | FLNB    | 1.8% |                 | ReMIC( $\beta=0.01$ );<br>ReMIC( $\beta=0.02$ );<br>ReMIC( $\beta=0.03$ )             |
| 50 | DST     | 2.8% |                 | ReMIC( $\beta=0.01$ );<br>ReMIC( $\beta=0.02$ );<br>ReMIC( $\beta=0.03$ )                    | 150 | NLRC4   | 1.8% |                 | HotNet2;<br>ReMIC( $\beta=0.01$ );<br>ReMIC( $\beta=0.02$ )                           |
| 51 | NF1     | 2.8% | IntOGen         | ReMIC( $\beta=0.01$ );<br>ReMIC( $\beta=0.02$ )                                              | 151 | ERBB2   | 1.6% | CGC;<br>IntOGen | ReMIC( $\beta=0.01$ );<br>ReMIC( $\beta=0.02$ );<br>ReMIC( $\beta=0.03$ )             |
| 52 | TLN1    | 2.0% |                 |                                                                                              | 152 | CENPE   | 2.0% |                 | ReMIC( $\beta=0.01$ );<br>ReMIC( $\beta=0.02$ );<br>ReMIC( $\beta=0.03$ )             |
| 53 | MYO10   | 2.6% |                 | ReMIC( $\beta=0.01$ );<br>ReMIC( $\beta=0.02$ )                                              | 153 | PLXNA2  | 1.6% |                 | ReMIC( $\beta=0.01$ );<br>ReMIC( $\beta=0.02$ )                                       |
| 54 | CACNA1B | 2.6% |                 | ReMIC( $\beta=0.01$ );<br>ReMIC( $\beta=0.02$ );<br>ReMIC( $\beta=0.03$ )                    | 154 | SETDB1  | 1.4% | IntOGen         |                                                                                       |
| 55 | XIRP2   | 3.0% |                 |                                                                                              | 155 | ASMTL   | 1.6% |                 |                                                                                       |
| 56 | MACF1   | 2.2% | IntOGen         | ReMIC( $\beta=0.01$ );<br>ReMIC( $\beta=0.02$ );<br>ReMIC( $\beta=0.03$ )                    | 156 | CHD6    | 1.8% |                 | ReMIC( $\beta=0.01$ );<br>ReMIC( $\beta=0.02$ );<br>ReMIC( $\beta=0.03$ )             |
| 57 | PRKDC   | 2.0% |                 | ReMIC( $\beta=0.01$ );<br>ReMIC( $\beta=0.02$ )                                              | 157 | MYCBP2  | 1.8% |                 | ReMIC( $\beta=0.01$ );<br>ReMIC( $\beta=0.02$ )                                       |
| 58 | LAMA1   | 2.4% |                 | ReMIC( $\beta=0.01$ );<br>ReMIC( $\beta=0.02$ );<br>ReMIC( $\beta=0.03$ )                    | 158 | MYO7A   | 1.8% |                 | HotNet2;<br>ReMIC( $\beta=0.02$ )                                                     |
| 59 | SVEP1   | 2.8% | IntOGen         |                                                                                              | 159 | SCN10A  | 1.8% |                 |                                                                                       |
| 60 | HSPG2   | 2.2% |                 | ReMIC( $\beta=0.01$ );<br>ReMIC( $\beta=0.02$ );<br>ReMIC( $\beta=0.03$ )                    | 160 | HGFAC   | 1.6% |                 | ReMIC( $\beta=0.03$ )                                                                 |
| 61 | CACNA1E | 2.8% |                 | HotNet2;<br>ReMIC( $\beta=0.01$ );<br>ReMIC( $\beta=0.02$ );<br>ReMIC( $\beta=0.03$ )        | 161 | MAP2    | 1.8% |                 | ReMIC( $\beta=0.01$ );<br>ReMIC( $\beta=0.02$ );<br>ReMIC( $\beta=0.03$ )             |
| 62 | PKHD1   | 2.6% |                 | ReMIC( $\beta=0.01$ );<br>ReMIC( $\beta=0.02$ )                                              | 162 | UTP20   | 1.6% |                 |                                                                                       |
| 63 | AKAP9   | 2.2% | IntOGen         | ReMIC( $\beta=0.03$ );<br>MUFFINN(DNmax)                                                     | 163 | NEDD9   | 1.4% |                 | ReMIC( $\beta=0.02$ )                                                                 |
| 64 | RB1     | 1.8% | CGC;<br>IntOGen | ReMIC( $\beta=0.01$ )                                                                        | 164 | MYH9    | 1.6% | IntOGen         | ReMIC( $\beta=0.01$ );<br>ReMIC( $\beta=0.02$ );<br>ReMIC( $\beta=0.03$ )             |
| 65 | DNAH5   | 2.6% |                 | ReMIC( $\beta=0.01$ );<br>ReMIC( $\beta=0.02$ );<br>ReMIC( $\beta=0.03$ )                    | 165 | CR1     | 1.8% |                 | ReMIC( $\beta=0.01$ );<br>ReMIC( $\beta=0.02$ );<br>ReMIC( $\beta=0.03$ )             |
| 66 | F5      | 2.2% |                 | HotNet2;<br>ReMIC( $\beta=0.01$ );<br>ReMIC( $\beta=0.02$ );<br>ReMIC( $\beta=0.03$ )        | 166 | PKD1    | 2.0% |                 | ReMIC( $\beta=0.01$ );<br>ReMIC( $\beta=0.02$ )                                       |
| 67 | BZRAP1  | 2.2% |                 | ReMIC( $\beta=0.01$ );<br>ReMIC( $\beta=0.02$ );<br>ReMIC( $\beta=0.03$ )                    | 167 | CABIN1  | 1.6% |                 |                                                                                       |
| 68 | CHD4    | 2.2% | IntOGen         | ReMIC( $\beta=0.01$ );<br>ReMIC( $\beta=0.02$ );<br>ReMIC( $\beta=0.03$ );<br>MUFFINN(DNsum) | 168 | DYNC2H1 | 1.8% |                 | ReMIC( $\beta=0.01$ );<br>ReMIC( $\beta=0.02$ );<br>ReMIC( $\beta=0.03$ )             |
| 69 | CAPN1   | 2.2% |                 | ReMIC( $\beta=0.01$ );<br>ReMIC( $\beta=0.02$ );<br>ReMIC( $\beta=0.03$ )                    | 169 | MYB     | 1.6% | IntOGen         | ReMIC( $\beta=0.01$ );<br>ReMIC( $\beta=0.02$ );<br>ReMIC( $\beta=0.03$ )             |
| 70 | ACTN2   | 1.8% |                 | ReMIC( $\beta=0.01$ );<br>ReMIC( $\beta=0.02$ );<br>ReMIC( $\beta=0.03$ );<br>MUFFINN(DNmax) | 170 | GOLGB1  | 1.8% |                 | ReMIC( $\beta=0.01$ );<br>ReMIC( $\beta=0.03$ )                                       |

|     |         |      |                 |                                                                                              |     |          |      |     |                                                                                              |
|-----|---------|------|-----------------|----------------------------------------------------------------------------------------------|-----|----------|------|-----|----------------------------------------------------------------------------------------------|
| 71  | CACNA1C | 2.4% |                 | HotNet2;<br>ReMIC( $\beta=0.01$ );<br>ReMIC( $\beta=0.02$ );<br>ReMIC( $\beta=0.03$ )        | 171 | PLXNA4   | 2.4% |     | ReMIC( $\beta=0.01$ );<br>ReMIC( $\beta=0.02$ )                                              |
| 72  | GRIN2B  | 2.0% |                 | ReMIC( $\beta=0.01$ );<br>ReMIC( $\beta=0.02$ );<br>ReMIC( $\beta=0.03$ )                    | 172 | CNTN1    | 1.6% |     | HotNet2;<br>ReMIC( $\beta=0.01$ );<br>ReMIC( $\beta=0.02$ );<br>ReMIC( $\beta=0.03$ )        |
| 73  | ZFHX3   | 2.8% |                 |                                                                                              | 173 | DSCAML1  | 1.8% |     | HotNet2;<br>ReMIC( $\beta=0.01$ );<br>ReMIC( $\beta=0.02$ );<br>ReMIC( $\beta=0.03$ )        |
| 74  | UBC     | 1.4% |                 |                                                                                              | 174 | GRIK2    | 1.6% |     | HotNet2;<br>ReMIC( $\beta=0.01$ );<br>ReMIC( $\beta=0.02$ );<br>ReMIC( $\beta=0.03$ )        |
| 75  | HECW1   | 2.6% |                 | ReMIC( $\beta=0.01$ );<br>ReMIC( $\beta=0.02$ );<br>ReMIC( $\beta=0.03$ )                    | 175 | CACNA1A  | 2.0% |     | ReMIC( $\beta=0.01$ );<br>ReMIC( $\beta=0.02$ );<br>ReMIC( $\beta=0.03$ );<br>MUFFINN(DNsum) |
| 76  | AFF2    | 2.8% |                 | ReMIC( $\beta=0.01$ );<br>ReMIC( $\beta=0.02$ );<br>ReMIC( $\beta=0.03$ );<br>MUFFINN(DNmax) | 176 | ARID1B   | 2.0% | CGC | ReMIC( $\beta=0.01$ );<br>ReMIC( $\beta=0.02$ );<br>ReMIC( $\beta=0.03$ )                    |
| 77  | ERBB3   | 1.8% |                 | ReMIC( $\beta=0.01$ );<br>ReMIC( $\beta=0.02$ );<br>ReMIC( $\beta=0.03$ )                    | 177 | KIF13A   | 1.6% |     |                                                                                              |
| 78  | DNAH3   | 3.0% |                 | ReMIC( $\beta=0.01$ );<br>ReMIC( $\beta=0.02$ );<br>ReMIC( $\beta=0.03$ )                    | 178 | TCHH     | 1.8% |     |                                                                                              |
| 79  | ITPR1   | 2.0% |                 | ReMIC( $\beta=0.01$ );<br>ReMIC( $\beta=0.02$ );<br>ReMIC( $\beta=0.03$ )                    | 179 | BRIP1    | 2.0% |     | ReMIC( $\beta=0.01$ );<br>ReMIC( $\beta=0.02$ );<br>ReMIC( $\beta=0.03$ )                    |
| 80  | MED12   | 2.2% |                 | ReMIC( $\beta=0.01$ );<br>ReMIC( $\beta=0.02$ );<br>ReMIC( $\beta=0.03$ );<br>MUFFINN(DNsum) | 180 | RLF      | 1.8% |     | ReMIC( $\beta=0.01$ )                                                                        |
| 81  | TBX3    | 2.8% | CGC;<br>IntOGen |                                                                                              | 181 | KIAA0430 | 1.6% |     | HotNet2;<br>ReMIC( $\beta=0.01$ );<br>ReMIC( $\beta=0.03$ )                                  |
| 82  | SF3B1   | 2.0% | IntOGen         | ReMIC( $\beta=0.01$ )                                                                        | 182 | LRBA     | 2.2% |     | ReMIC( $\beta=0.01$ );<br>ReMIC( $\beta=0.02$ );<br>ReMIC( $\beta=0.03$ )                    |
| 83  | DCC     | 2.0% |                 | ReMIC( $\beta=0.01$ );<br>ReMIC( $\beta=0.02$ );<br>ReMIC( $\beta=0.03$ )                    | 183 | NRXN3    | 1.8% |     | HotNet2;<br>ReMIC( $\beta=0.01$ );<br>ReMIC( $\beta=0.02$ )                                  |
| 84  | CROCC   | 2.4% |                 | ReMIC( $\beta=0.01$ );<br>ReMIC( $\beta=0.02$ );<br>ReMIC( $\beta=0.03$ )                    | 184 | TLR4     | 1.4% |     |                                                                                              |
| 85  | CACNA1G | 2.8% |                 | ReMIC( $\beta=0.01$ );<br>ReMIC( $\beta=0.02$ );<br>ReMIC( $\beta=0.03$ )                    | 185 | ERBB4    | 1.6% |     | ReMIC( $\beta=0.01$ );<br>ReMIC( $\beta=0.02$ );<br>ReMIC( $\beta=0.03$ )                    |
| 86  | WWP2    | 2.0% |                 |                                                                                              | 186 | PDCD11   | 1.4% |     |                                                                                              |
| 87  | MYLK    | 2.0% |                 | HotNet2;<br>ReMIC( $\beta=0.01$ );<br>ReMIC( $\beta=0.02$ );<br>ReMIC( $\beta=0.03$ )        | 187 | NCOA3    | 1.4% |     | ReMIC( $\beta=0.02$ )                                                                        |
| 88  | ZFPM2   | 2.2% |                 |                                                                                              | 188 | GCN1L1   | 1.4% |     |                                                                                              |
| 89  | PCNT    | 2.2% |                 | ReMIC( $\beta=0.01$ );<br>ReMIC( $\beta=0.02$ );<br>ReMIC( $\beta=0.03$ )                    | 189 | ANK2     | 1.4% |     | ReMIC( $\beta=0.01$ );<br>ReMIC( $\beta=0.03$ )                                              |
| 90  | ARID1A  | 2.2% | CGC;<br>IntOGen | ReMIC( $\beta=0.01$ );<br>ReMIC( $\beta=0.02$ );<br>ReMIC( $\beta=0.03$ )                    | 190 | HECW2    | 1.8% |     | ReMIC( $\beta=0.01$ );<br>ReMIC( $\beta=0.02$ );<br>ReMIC( $\beta=0.03$ )                    |
| 91  | ATN1    | 1.8% |                 | ReMIC( $\beta=0.01$ );<br>ReMIC( $\beta=0.02$ );<br>ReMIC( $\beta=0.03$ )                    | 191 | GRIA1    | 1.6% |     | ReMIC( $\beta=0.01$ );<br>ReMIC( $\beta=0.03$ )                                              |
| 92  | UTRN    | 2.2% |                 |                                                                                              | 192 | IKBKE    | 1.2% |     |                                                                                              |
| 93  | UBR5    | 2.0% |                 |                                                                                              | 193 | CUL7     | 1.6% |     | ReMIC( $\beta=0.01$ );<br>ReMIC( $\beta=0.02$ )                                              |
| 94  | CIT     | 2.2% |                 | ReMIC( $\beta=0.01$ );<br>ReMIC( $\beta=0.02$ );<br>ReMIC( $\beta=0.03$ )                    | 194 | AKAP4    | 1.6% |     | ReMIC( $\beta=0.01$ );<br>ReMIC( $\beta=0.02$ )                                              |
| 95  | EGFR    | 1.4% | IntOGen         | ReMIC( $\beta=0.01$ );<br>ReMIC( $\beta=0.02$ );<br>ReMIC( $\beta=0.03$ )                    | 195 | NUP160   | 1.6% |     | HotNet2;<br>ReMIC( $\beta=0.01$ );<br>ReMIC( $\beta=0.02$ )                                  |
| 96  | CFH     | 2.0% |                 | HotNet2;<br>ReMIC( $\beta=0.01$ );<br>ReMIC( $\beta=0.02$ );<br>ReMIC( $\beta=0.03$ )        | 196 | KCNQ3    | 1.4% |     | HotNet2                                                                                      |
| 97  | SRRM2   | 1.8% |                 |                                                                                              | 197 | SEC24B   | 1.4% |     |                                                                                              |
| 98  | ANK3    | 2.2% | IntOGen         | HotNet2;<br>ReMIC( $\beta=0.01$ );<br>ReMIC( $\beta=0.02$ );<br>ReMIC( $\beta=0.03$ )        | 198 | DNAH7    | 2.0% |     | ReMIC( $\beta=0.01$ );<br>ReMIC( $\beta=0.03$ )                                              |
| 99  | PTPRD   | 2.2% |                 | ReMIC( $\beta=0.01$ )                                                                        | 199 | COL6A3   | 2.0% |     | ReMIC( $\beta=0.01$ );<br>ReMIC( $\beta=0.02$ );<br>ReMIC( $\beta=0.03$ )                    |
| 100 | ATRX    | 2.0% |                 | ReMIC( $\beta=0.01$ );<br>ReMIC( $\beta=0.02$ );<br>ReMIC( $\beta=0.03$ )                    | 200 | RIPK1    | 1.4% |     |                                                                                              |

**Table S6.** Functional enrichment analysis results for KEGG pathways [8] of the top 200 genes of the proposed method on COADREAD dataset. The pathways are sorted by their enrichment p-values.

| Pathway                    | Count | %     | p-value  | Pathway                               | Count | %    | p-value  |
|----------------------------|-------|-------|----------|---------------------------------------|-------|------|----------|
| Focal adhesion             | 20    | 10.05 | 2.15e-09 | Thyroid cancer                        | 5     | 2.51 | 1.51e-03 |
| Pathways in cancer         | 27    | 13.57 | 2.45e-09 | Gap junction                          | 7     | 3.52 | 4.29e-03 |
| Colorectal cancer          | 12    | 6.03  | 7.18e-09 | GnRH signaling pathway                | 7     | 3.52 | 5.05e-03 |
| Pancreatic cancer          | 10    | 5.03  | 1.61e-06 | Melanogenesis                         | 7     | 3.52 | 7.96e-03 |
| Prostate cancer            | 11    | 5.53  | 2.66e-06 | TGF-beta signaling pathway            | 6     | 3.02 | 1.56e-02 |
| Endometrial cancer         | 9     | 4.52  | 2.77e-06 | Chemokine signaling pathway           | 9     | 4.52 | 1.61e-02 |
| Non-small cell lung cancer | 8     | 4.02  | 4.83e-05 | Regulation of actin cytoskeleton      | 9     | 4.52 | 3.14e-02 |
| Glioma                     | 8     | 4.02  | 1.27e-04 | Wnt signaling pathway                 | 7     | 3.52 | 3.37e-02 |
| Adherens junction          | 8     | 4.02  | 2.23e-04 | Insulin signaling pathway             | 7     | 3.52 | 3.37e-02 |
| Chronic myeloid leukemia   | 8     | 4.02  | 2.44e-04 | Cell adhesion molecules (CAMs)        | 7     | 3.52 | 3.80e-02 |
| Calcium signaling pathway  | 12    | 6.03  | 2.79e-04 | Neurotrophin signaling pathway        | 6     | 3.02 | 5.89e-02 |
| Acute myeloid leukemia     | 7     | 3.52  | 4.04e-04 | Basal cell carcinoma                  | 4     | 2.01 | 7.13e-02 |
| Small cell lung cancer     | 8     | 4.02  | 6.77e-04 | Axon guidance                         | 6     | 3.02 | 7.16e-02 |
| Bladder cancer             | 6     | 3.02  | 6.86e-04 | Dorso-ventral axis formation          | 3     | 1.51 | 8.04e-02 |
| ErbB signaling pathway     | 8     | 4.02  | 7.78e-04 | mTOR signaling pathway                | 4     | 2.01 | 8.08e-02 |
| Renal cell carcinoma       | 7     | 3.52  | 9.05e-04 | VEGF signaling pathway                | 4     | 2.01 | 9.08e-02 |
| Cell cycle                 | 9     | 4.52  | 1.42e-03 | Phosphatidylinositol signaling system | 5     | 2.51 | 9.25e-02 |
| Melanoma                   | 7     | 3.52  | 1.44e-03 | Apoptosis                             | 4     | 2.01 | 9.43e-02 |

**Table S7.** Functional enrichment analysis results for KEGG pathways [8] of the top 200 genes of the proposed method on BRCA dataset. The pathways are sorted by their enrichment p-values.

| Pathway                    | Count | %    | p-value  | Pathway                              | Count | %    | p-value  |
|----------------------------|-------|------|----------|--------------------------------------|-------|------|----------|
| Calcium signaling pathway  | 16    | 8.12 | 3.11e-07 | Chronic myeloid leukemia             | 7     | 3.55 | 1.36e-03 |
| Focal adhesion             | 17    | 8.63 | 3.46e-07 | Acute myeloid leukemia               | 6     | 3.05 | 2.54e-03 |
| ErbB signaling pathway     | 10    | 5.08 | 1.53e-05 | Bladder cancer                       | 5     | 2.54 | 5.03e-03 |
| Endometrial cancer         | 8     | 4.06 | 2.51e-05 | Ubiquitin mediated proteolysis       | 8     | 4.06 | 8.77e-03 |
| Small cell lung cancer     | 9     | 4.57 | 9.16e-05 | Toll-like receptor signaling pathway | 7     | 3.55 | 9.31e-03 |
| Pathways in cancer         | 19    | 9.64 | 1.07e-04 | mTOR signaling pathway               | 5     | 2.54 | 1.69e-02 |
| Pancreatic cancer          | 8     | 4.06 | 1.09e-04 | Colorectal cancer                    | 5     | 2.54 | 2.11e-02 |
| Glioma                     | 8     | 4.06 | 1.09e-04 | Tight junction                       | 7     | 3.55 | 2.94e-02 |
| Prostate cancer            | 9     | 4.57 | 1.17e-04 | Adherens junction                    | 5     | 2.54 | 3.27e-02 |
| Melanoma                   | 8     | 4.06 | 1.91e-04 | GnRH signaling pathway               | 5     | 2.54 | 6.97e-02 |
| Non-small cell lung cancer | 7     | 3.55 | 3.53e-04 | Dorso-ventral axis formation         | 3     | 1.52 | 7.70e-02 |
| MAPK signaling pathway     | 14    | 7.11 | 3.79e-04 | Thyroid cancer                       | 3     | 1.52 | 8.71e-02 |
| Apoptosis                  | 7     | 3.55 | 6.15e-04 |                                      |       |      |          |

## References

- [1] P. A. Futreal, L. Coin, M. Marshall, T. Down, T. Hubbard, R. Wooster, N. Rahman, M. R. Stratton, A census of human cancer genes, *Nature Reviews Cancer* 4 (3) (2004) 177–183.
- [2] A. Gonzalez-Perez, C. Perez-Llamas, J. Deu-Pons, D. Tamborero, M. P. Schroeder, A. Jene-Sanz, A. Santos, N. Lopez-Bigas, IntOGen-mutations identifies cancer drivers across tumor types, *Nature methods* 10 (11) (2013) 1081–1082.
- [3] S. Razick, G. Magklaras, I. M. Donaldson, iRefIndex: a consolidated protein interaction database with provenance, *BMC bioinformatics* 9 (1) (2008) 1.
- [4] D. Szklarczyk, A. Franceschini, S. Wyder, K. Forslund, D. Heller, J. Huerta-Cepas, M. Simonovic, A. Roth, A. Santos, K. P. Tsafou, et al., STRING v10: protein–protein interaction networks, integrated over the tree of life, *Nucleic acids research* 43 (D1) (2014) D447–D452.
- [5] M. D. Leiserson, F. Vandin, H.-T. Wu, J. R. Dobson, B. R. Raphael, Pan-cancer identification of mutated pathways and protein complexes, *Cancer Research* 74 (19 Supplement) (2014) 5324–5324.
- [6] S. Babaei, M. Hulsman, M. Reinders, J. de Ridder, Detecting recurrent gene mutation in interaction network context using multi-scale graph diffusion, *BMC bioinformatics* 14 (1) (2013) 29.
- [7] A. Cho, J. E. Shim, E. Kim, F. Supek, B. Lehner, I. Lee, MUFFINN: cancer gene discovery via network analysis of somatic mutation data, *Genome Biology* 17 (1) (2016) 129.
- [8] M. Kanehisa, Y. Sato, M. Kawashima, M. Furumichi, M. Tanabe, KEGG as a reference resource for gene and protein annotation, *Nucleic acids research* (2015) gkv1070.
